1 **PRDM1 DNA-binding zinc finger domain is required for normal limb development**  
2 **and is disrupted in Split Hand/Foot Malformation**

3

4 Brittany T. Truong<sup>1,2</sup>, Lomeli C. Shull<sup>2</sup>, Ezra Lencer<sup>3</sup>, Eric G. Bend<sup>4\*</sup>, Michael Field<sup>5</sup>,  
5 University of Washington Center for Mendelian Genomics (UW-CMG), David Everman<sup>4</sup>,  
6 Charles E. Schwartz<sup>4†</sup>, Heather Flanagan-Steet<sup>4</sup>, Kristin B. Artinger<sup>2</sup>

7

8 <sup>1</sup>Human Medical Genetics & Genomics Graduate Program, University of Colorado  
9 Denver Anschutz Medical Campus, Aurora, CO, USA

10 <sup>2</sup>Department of Craniofacial Biology, University of Colorado Denver Anschutz Medical  
11 Campus, Aurora, CO, USA

12 <sup>3</sup>Biology Department, Lafayette College, Easton, PA, USA

13 <sup>4</sup>Greenwood Genetics Center, Greenwood, SC, USA

14 <sup>5</sup>Genetics of Learning Disability Service, Hunter Genetics, Waratah, NSW, AUS

15 \*Current affiliation, PreventionGenetics, part of Exact Sciences, Marshfield, WI, USA

16 †Current affiliation, Department of Pediatrics and Human Development, Michigan State  
17 University, Grand Rapids, MI, USA

18

19 **Correspondence:** Kristin Bruk Artinger, Department of Craniofacial Biology, University  
20 of Colorado Anschutz Medical Campus, 12801 E. 17<sup>th</sup> Ave., MS-8120, Aurora, CO  
21 80045.

22 **Email:** [Kristin.Artinger@CUAnschutz.edu](mailto:Kristin.Artinger@CUAnschutz.edu)

23 **ORCID:** <https://orcid.org/0000-0002-3003-604>

24

25 **Key words:** pectoral fin, limb, PRDM1, Split Hand/Foot Malformation, zebrafish

26

27

28 **SUMMARY STATEMENT**

29 PRDM1 proline/serine and zinc finger domains are required to regulate limb induction,  
30 outgrowth, and anterior/posterior patterning. Variants in PRDM1 are shown to cause  
31 Split Hand/Foot Malformation in humans.

32

33 **ABSTRACT**

34 Split Hand/Foot Malformation (SHFM) is a rare limb abnormality with clefting of  
35 the fingers and/or toes. For many patients, the genetic etiology is unknown. Through  
36 whole exome and targeted sequencing, we detected three novel variants in a  
37 transcription factor, *PRDM1* that arose *de novo* in families with SHFM or segregated  
38 with the phenotype. PRDM1 is required for limb development; however, its role is not  
39 well understood, and it is unclear how the *PRDM1* variants affect protein function. Using  
40 transient and stable overexpression rescue experiments in zebrafish, we show that the  
41 variants, which disrupt the proline/serine-rich and DNA-binding zinc finger domains  
42 have reduced function compared to wildtype *PRDM1*. Through gene expression assays,  
43 RNA-seq, and CUT&RUN in isolated pectoral fin cells, we demonstrate that Prdm1a  
44 directly binds to and regulates genes required for limb induction, outgrowth, and  
45 anterior/posterior patterning, such as *fgfr1a*, *dlx5a*, *dlx6a*, and *smo*. Together, these  
46 results improve our understanding of the role of PRDM1 in the limb gene regulatory  
47 network and demonstrate the pathogenicity of *PRDM1* variants in humans.

## 48 INTRODUCTION

49 Vertebrate limb development is controlled by a complex gene regulatory network  
50 (GRN) governed by signaling pathways, transcription factors, and epigenetic modifiers.  
51 Limb growth begins at the lateral plate mesoderm, where mesenchyme precursors form  
52 a small bud surrounded by an ectodermal layer. Retinoic acid and Wnt signaling initiate  
53 limb induction (Grandel et al., 2002; Ng et al., 2002), and outgrowth is driven by the  
54 apical ectodermal ridge (AER), where transcription factors TBX5 and TP63 induce  
55 expression of fibroblast growth factor 10 (*Fgf10*) in the mesenchyme and *Fgf8* in the  
56 outer ectoderm (Agarwal et al., 2003; Bakkers et al., 2002; Ng et al., 2002). This  
57 establishes a complex epithelial-mesenchymal feedback loop that then activates  
58 proliferation and differentiation of mesenchymal cells for limb growth (proximal/distal  
59 axis) (Ohuchi et al., 1997). Anterior/posterior patterning, or establishment of digits 1-5,  
60 is regulated by sonic hedgehog (Shh) signaling in the zone of polarizing activity (ZPA)  
61 (Riddle et al., 1993; Saunders & Gasseling, 1968). Each gene and pathway are  
62 interconnected, and dysregulation at any point, particularly in the AER, can cause  
63 abnormal limb growth (Kantaputra & Carlson, 2019).

64 Misregulation of the limb GRN can lead to congenital limb defects, which affect 1  
65 in 2,000 newborns (Wilcox et al., 2015). Split Hand/Foot Malformation (SHFM) is a limb  
66 abnormality resulting in missing, curved, and/or clefted digits. SHFM occurs in 1 in  
67 18,000 live births, and there are six known isotypes of the disease due to pathogenic  
68 variants in *WNT10B* (MIM #225300), *TP63* (MIM #605289), and *DLX5* (MIM #225300)  
69 or chromosomal rearrangements in chromosomes 2 (MIM #606708), 10 (MIM  
70 #246560), and X (MIM #313350); however, in 50% of cases, the genetic etiology is  
71 unknown (Sowinska-Seidler et al., 2014). Deletions and translocations at 6q21 have  
72 also been associated with SHFM, though no candidate gene has been isolated prior to  
73 now (Braverman et al., 1993; Correa-Cerro et al., 1996; Duran-Gonzalez et al., 2007;  
74 Gurrieri et al., 1995; Hopkin et al., 1997; Pandya et al., 1995; Tsukahara et al., 1997;  
75 Viljoen & Smart, 1993). Here, we report three families with SHFM of unknown genetic  
76 etiology, and using whole exome sequencing (WES) and targeted sequencing, we  
77 identified three different variants of unknown significance in a transcription factor,  
78 *PRDM1*, located at 6q21.

79 PRDM1, also known as BLIMP1 (MIM \*603423), is required for limb  
80 development, though its role not well understood (Ha & Riddle, 2003; Lee & Roy, 2006;  
81 Mercader et al., 2006; Robertson et al., 2007; Vincent et al., 2005; Wilm & Solnica-  
82 Krezel, 2005). The protein has an N-terminal SET domain, followed by a proline/serine-  
83 rich domain, and five zinc fingers. In various contexts, PRDM1 can bind to DNA through  
84 its zinc finger domains and activate or repress gene expression (reviewed in Bikoff et al.  
85 (2009); (Powell et al., 2013)). SET domains are often associated with histone  
86 methyltransferase activity (Cheng et al., 2005; Martin & Zhang, 2005), but this has not  
87 been observed for PRDM1 *in vivo* (Hohenauer & Moore, 2012). Rather, it can indirectly  
88 alter transcription by forming complexes with chromatin-modifying proteins, such as  
89 histone demethylase Kdm4a (Prajapati et al., 2019), histone methyltransferases Prmt5  
90 (Ancelin et al., 2006) and G9a (Gyory et al., 2004) and histone deacetylases HDAC1/2  
91 (Yu et al., 2000) at both the pro/ser and zinc finger domains (reviewed in Bikoff et al.  
92 (2009)). Studies in mice and zebrafish indicate that PRDM1 is important for limb  
93 formation. Conditional knockouts of *Prdm1* in the embryo proper (*Sox2:Cre*) causes loss  
94 of posterior digits in mice due to disruption of sonic hedgehog signaling and  
95 misregulation in the ZPA (Robertson et al., 2007). Zebrafish embryos injected with  
96 *prdm1a* morpholinos (“morphants”) for targeted knockdown fail to develop a pectoral fin,  
97 which is homologous to mammalian forelimbs, while a hypomorphic allele,  
98 *prdm1a*<sup>tp39/tp39</sup>, presents with mild phenotypes, namely shortening of the  
99 scapulocoracoid and variable truncation of the fin overall (Lee & Roy, 2006; Mercader et  
100 al., 2006). These studies show that PRDM1 is downstream of *tbx5a* and upstream of  
101 *fgf10a* during fin induction. It is also required for *shh* activity in the ZPA (Lee & Roy,  
102 2006; Mercader et al., 2006). However, it is unclear whether this is by direct  
103 transcriptional regulation or by recruitment of epigenetic modifiers. While PRDM1 has  
104 been shown to be important in limb development, how it functions molecularly is poorly  
105 understood.

106 In this study, we sought to better understand the mechanistic role of PRDM1 in  
107 limb development. We identify novel *PRDM1* variants in SHFM patients and show  
108 through transient and stable overexpression assays in zebrafish that the variants have  
109 reduced function compared to wildtype PRDM1 due to disruption of the pro/ser and

110 DNA-binding zinc finger domains. We use RNA-seq and CUT&RUN in isolated pectoral  
111 fin cells to show that *Prdm1a* directly binds to *fgfr1a*, *dlx5a*, *dlx6a*, and *smo* and  
112 regulates their expression in the fin. These data show that PRDM1 is involved in limb  
113 induction, outgrowth, and anterior/posterior patterning and requires its pro/ser and zinc  
114 finger domains to accomplish these morphogenic processes. Together, these results  
115 improve our understanding of the role of PRDM1 in the limb gene regulatory network  
116 and demonstrate the pathogenicity of *PRDM1* variants in humans.

117

## 118 RESULTS

### 119 Whole exome sequencing in SHFM patients reveals novel *PRDM1* variants of 120 unknown significance.

121 SHFM is a congenital limb disorder, in which patients exhibit missing, shortened,  
122 or clefting of the fingers and toes. Phenotypes vary in terms of severity as well as  
123 bilateral symmetry. For 50% of individuals, the genetic etiology is unknown. We  
124 performed WES on a multi-generational family with SHFM that was negative for known  
125 SHFM associated genes and exhibited no chromosomal rearrangements cytogenetically  
126 or by microarray analyses. Four individuals were heterozygous for a mutation in  
127 *PRDM1*, *PRDM1c.712\_713insT* (p.C239Lfs\*32), which introduces a single base pair  
128 insertion causing a frameshift and premature stop codon after the SET domain as well  
129 as predicted truncation of the protein (**Fig. 1A-B**). The pLI score (probability of being  
130 loss-of-function intolerant) for *PRDM1* on gnomAD is 0.96, suggesting the gene is  
131 intolerant to loss-of-function variants. This variant also has a minor allele frequency  
132 (MAF) of 0 in gnomAD, is predicted to be pathogenic by MutationTaster  
133 ([www.mutationtaster.org](http://www.mutationtaster.org)), and is the only gene from the WES results involved in limb  
134 development (**Fig. 1A; Table S1**) (Ha & Riddle, 2003; Lee & Roy, 2006; Mercader et al.,  
135 2006; Robertson et al., 2007; Vincent et al., 2005; Wilm & Solnica-Krezel, 2005).  
136 Phenotypes for the individuals in this family who carry the variant differ in severity.  
137 Individuals II:3 and III:3 have missing and curved fingers but normal feet. Individual III:3  
138 has clefted digits and a missing toe. Individual III:4 has a mild phenotype of minor  
139 brachydactyly, or shortened digits. Individuals IV:1 and IV:2 are monozygotic twins,  
140 though only IV:2 has SHFM (missing digits and clefting) (**Fig. 1C**). This is likely due to

141 environmental differences while *in utero* and/or epigenetic differences (Castillo-  
142 Fernandez et al., 2014; Gordon et al., 2012). This form of SHFM is inherited in an  
143 autosomal dominant manner with variable penetrance and expressivity.

144 We then screened an additional 75 unrelated SHFM patients. Two individuals  
145 were negative for any *TP63* variants or chromosomal abnormalities, but we identified  
146 two additional missense variants in *PRDM1*. The second variant is *PRDM1c.1571C>G*  
147 (p.T524R) and the third is *PRDM1c.2455A>G* (p.T819A) (**Fig. 1A**). Individuals were  
148 heterozygous, and the variants were absent from both sets of parents based on  
149 targeted sequencing, suggesting a *de novo* mutation (**Fig. 1D-E**). Both variants have a  
150 MAF of  $\leq 6.6E-4$  (gnomAD) and are predicted to be pathogenic by at least two dbNSFP  
151 tools (<https://sites.google.com/site/jpopgen/dbNSFP>) (**Table 1A**) (Liu et al., 2020).  
152 Additionally, they flank the zinc finger domain of *PRDM1* and may result in a loss of  
153 phosphorylation at these sites or affect protein folding and its ability to bind DNA (**Fig.**  
154 **1B**) (Keller & Maniatis, 1992). Together, our data suggest that variants in *PRDM1* may  
155 result in SHFM phenotypes.

#### 156 **Loss of Prdm1a causes pectoral fin defects.**

157 *PRDM1* is required for vertebrate limb development (Ha & Riddle, 2003; Lee &  
158 Roy, 2006; Mercader et al., 2006; Robertson et al., 2007; Vincent et al., 2005; Wilm &  
159 Solnica-Krezel, 2005). The zebrafish pectoral fin is homologous to mammalian  
160 forelimbs, and its early structures consist of a cleithrum, scapulocoracoid/postcoracoid,  
161 endoskeletal disk, and fin fold, which are all derived from mesenchymal cells (**Fig. 2A**)  
162 (Grandel & Schulte-Merker, 1998). In zebrafish, *prdm1a* is first expressed in the  
163 pectoral fin at 18 hpf. It is highly expressed in the fin mesenchyme, pharyngeal arches,  
164 and neurons at 24 hpf (**Fig. 2B**). At 48 hpf, expression continues in the pharyngeal  
165 arches and neurons, and *prdm1a* is present in the apical ectodermal ridge (AER), the  
166 primary outgrowth signaling center of the limb (Wilm & Solnica-Krezel, 2005) (**Fig. 2C**).  
167 Previous studies have shown that knockdown of *prdm1a* using anti-sense morpholinos  
168 completely disrupts pectoral fin growth (Mercader et al., 2006). Hypomorph  
169 *prdm1a*<sup>tp39/tp39</sup> mutants, which have a missense mutation (p.H564R) in the second zinc  
170 finger (**Fig. 2D**), present with mild phenotypes, namely a shortening of the  
171 scapulocoracoid and variable truncation of the fin, which is incompletely penetrant,

172 occurring in only 30% of mutants (Baxendale et al., 2004; Lee & Roy, 2006; Roy et al.,  
173 2001). Predicted null *prdm1a*<sup>m805/m805</sup> mutants, hereafter referred to as *prdm1a*<sup>-/-</sup>, have a  
174 mutation resulting in a premature stop codon in the SET domain (p.W154\*) (**Fig. 2D**)  
175 (Artinger et al., 1999; Hernandez-Lagunas et al., 2005). To evaluate fin phenotypes in  
176 *prdm1a*<sup>-/-</sup> mutants, embryos were stained with Alcian blue to assess cartilage  
177 development at 4 dpf (days post fertilization). There are no significant differences  
178 between wildtype and *prdm1a*<sup>+/-</sup> heterozygotes (**Fig. S1**). Heterozygotes were included  
179 in all wildtype measurements. *prdm1a*<sup>-/-</sup> mutants present with severe pectoral fin defects  
180 (**Fig. 2E-J**). There is a significant decrease in the average length of the cleithrum (~20%  
181 decrease, p=0.0173), endoskeletal disk (8.7%, p=0.0816), and fin fold (10.6%,  
182 p=0.0374) (**Fig. 2G-J**). These data suggest that the zinc finger domain is important for  
183 the function of Prdm1a in pectoral fin development and is specifically required for  
184 outgrowth of the skeletal elements.

#### 185 **SHFM *hPRDM1* variants are not functional.**

186 To test whether the SHFM *hPRDM1* variants are functional, we designed an *in*  
187 *vivo* pectoral fin rescue experiment, where *hPRDM1* variants were overexpressed. We  
188 overexpressed either wildtype *hPRDM1* mRNA or each of the three SHFM variants in  
189 intercrossed *prdm1a*<sup>+/-</sup> zebrafish embryos. In *prdm1a*<sup>-/-</sup> mutants, injection of wildtype  
190 *hPRDM1* partially rescues the pectoral fin and more closely resembles those of  
191 uninjected wildtype (**Fig. 3A-C**), particularly the length of the cleithrum (12% increase),  
192 endoskeletal disk (5.5%), and fin fold (6%) (**Fig. 3G-J**). Inability of the wildtype allele to  
193 fully rescue the pectoral fin is likely due to the transience of the assay and rapid  
194 degradation of the mRNA. In contrast, overexpression of the three SHFM variants fails  
195 to rescue the elements of the pectoral fin (**Fig. 3D-F**). Indeed, injection of *hPRDM1*  
196 variant (p.T819A) in mutants further exacerbates hypoplasia of the endoskeletal disk  
197 (p=0.0138) (**Fig. 3F,H**). These data suggest that the SHFM variants are pathogenic and  
198 have reduced function compared to the wildtype allele. Interestingly, overexpression of  
199 the SHFM variants *hPRDM1* (p.C239Lfs\*32) and (p.T819A) led to a significant decrease  
200 in endoskeletal disk length in wildtype embryos (p=0.0135 and p=0.0280, respectively),  
201 suggesting a dominant negative effect of the alleles on pectoral fin development (**Fig.**

202 **S2).** Given the location of the alleles, we would predict that the zinc finger domain is  
203 important for the function of PRDM1 in limb development.

204 **Prdm1a proline/serine-rich and DNA-binding zinc finger domains are required to**  
205 **regulate pectoral fin development.**

206 PRDM1 has an N-terminal SET domain, followed by a pro/ser-rich domain, and  
207 five zinc fingers. Although it lacks histone methyltransferase activity at its SET domain,  
208 PRDM1 is capable of modifying chromatin by recruiting epigenetic modifiers to either its  
209 pro/ser-rich or zinc finger domains (Ancelin et al., 2006; Gyory et al., 2004; Prajapati et  
210 al., 2019; Su et al., 2009; Yu et al., 2000). It can also recruit Groucho proteins as co-  
211 repressors to its pro/ser domain (Ren et al., 1999) or bind directly to DNA at its zinc  
212 finger domain to activate transcription (Powell et al., 2013; von Hofsten et al., 2008).  
213 Moreover, the PRDM family of proteins regulate transcription in a highly cell/tissue  
214 specific manner (Fog et al., 2011).

215 To determine the functionally active domain of PRDM1 during limb development,  
216 we overexpressed modified versions of Prdm1a in null mutants using a stable,  
217 conditional Gal4/UAS system (**Fig. 4A-B**). Transgenic fish expressing Gal4 under a  
218 heat shock promoter, *Tg(hsp70l:gal4)<sup>co1025Tg</sup>*, were generated and crossed to *prdm1a<sup>+/-</sup>*  
219 to create *Tg(hsp70l:gal4);prdm1a<sup>+/-</sup>* fish. Using site-directed mutagenesis, we deleted  
220 each of the three functional domains of Prdm1a (**Fig. 4A; Table S2**). These deletions  
221 were modeled after previous *in vitro* studies (Gyory et al., 2004; Ren et al., 1999; Su et  
222 al., 2009; Yu et al., 2000). The modified genes were tagged with a self-cleaving 2a-  
223 EGFP reporter and placed under the control of a 4Xnr UAS enhancer. At the single cell-  
224 stage, we injected the *4XnrUAS-modified prdm1a-2a-EGFP* constructs into  
225 *Tg(hsp70l:gal4);prdm1a<sup>+/-</sup>* intercrossed embryos along with Tol2 transposase mRNA.  
226 During normal development, *prdm1a* is first expressed in the pectoral fin at 18 hpf.  
227 Therefore, we heat shocked the embryos at 6 hpf (shield stage), giving the embryos  
228 time to transcribe, translate, and activate the Gal4 protein. Gal4 protein then binds to  
229 UAS and activates transcription of the modified *prdm1a* construct. At 24 hpf, we  
230 screened embryos for mosaic EGFP expression (**Fig. 4C-D**), and then stained them  
231 with Alcian blue at 4 dpf to assess the level of rescue to the pectoral fin compared to  
232 uninjected controls (**Fig. 4E-L; Fig. S3**). Of note, mosaic EGFP expression in injected



233 and heat shocked embryos was highly variable and may have played a role in the  
234 construct's ability to rescue the pectoral fin. *prdm1a*<sup>-/-</sup> mutants injected with the positive  
235 control, full-length Prdm1a, exhibit a rescue, particularly in the endoskeletal disk (25.6%  
236 increase, p=0.0654) compared to uninjected controls (**Fig. 4F,G,N**). Interestingly,  
237 deletion of the SET domain (Prdm1a $\Delta$ SET) can also partially rescue the area of the  
238 scapulocoracoid/postcoracoid (38.0% increase, p=0.0446) (**Fig. 4H,P**), cleithrum  
239 (25.8%, p= 0.1252) (**Fig. 4M**) and endoskeletal disk (22.9%) (**Fig. 4N**), suggesting that  
240 this domain is not important for pectoral fin development. However, when either the  
241 proline/serine (Prdm1a $\Delta$ P/S) or zinc finger (Prdm1a $\Delta$ ZnF) domain is deleted, the  
242 construct fails to rescue the pectoral fin (**Fig. 4I-J, M-P**). Furthermore, when the two  
243 domains are deleted together (Prdm1a $\Delta$ P/S&ZnF), we fail to see a rescue in any of the  
244 structures (**Fig. 4K, M-P**). The pro/ser and zinc finger domains are important for  
245 recruiting epigenetic modifiers and binding DNA, respectively. Injection of a negative  
246 EGFP control also fails to rescue any cartilage structures in the pectoral fin of *prdm1a*<sup>-/-</sup>  
247 (**Fig. 4L-P**). Our data suggest that Prdm1a requires both its proline/serine and zinc  
248 finger domains to properly regulate fin development.

#### 249 **Prdm1a controls Fgf signaling in the fin mesenchyme and maintenance of** 250 **outgrowth and patterning genes.**

251 To determine the molecular mechanism by which Prdm1a regulates pectoral fin  
252 development, transgenic fish expressing EGFP under a mouse *Prx1* enhancer,  
253 *Tg(MmuPrx1:EGFP)<sup>co1026Tg</sup>*, were generated and crossed to *prdm1a*<sup>+/-</sup> to create  
254 *Tg(MmuPrx1:EGFP);prdm1a*<sup>+/-</sup> heterozygous fish. At 48 hpf, this transgene labels the  
255 pectoral fin, pharyngeal arches, and dorsal part of the head with EGFP (**Fig. 5A, A'**)  
256 (Hernandez-Vega & Minguillon, 2011; Yano & Tamura, 2013).  
257 *Tg(Mmu:Prx1:EGFP);prdm1a*<sup>+/-</sup> embryos were intercrossed, and at 48 hpf, wildtype and  
258 *prdm1a*<sup>-/-</sup> embryos were dissected to remove the head and pharyngeal arches. EGFP-  
259 positive pectoral fin cells were isolated using fluorescence-activated cell (FAC) sorting  
260 before they were subjected to bulk RNA-sequencing (RNA-seq) on the Illumina  
261 NovaSEQ 6000 system. Our RNA-seq analysis revealed a total of 1,476 differentially  
262 expressed genes between wildtype and *prdm1a*<sup>-/-</sup> mutants specifically in the pectoral fin  
263 (-log<sub>10</sub>≥1.2). Of these, 768 were upregulated, while 708 were downregulated (**Fig. 5B-**

264 **C).** The most significant downregulated gene was *emilin3a*, a glycoprotein within the  
265 extracellular matrix belonging to the EMILIN/multimerin family, that to date has been  
266 shown to be expressed in the notochord, pharyngeal arches, and developing  
267 craniofacial skeleton of zebrafish (Corallo et al., 2013; Milanetto et al., 2007). The  
268 *Tg(Mmu:Prx1-EGFP)* transgenic line used for the RNA-seq also expresses EGFP in the  
269 pharyngeal arches and dorsal part of the head at 48 hpf (Hernandez-Vega & Minguillon,  
270 2011; Yano & Tamura, 2013). Though we dissected and removed these regions prior to  
271 FAC sorting, there may have been some residual arch and dorsal head tissue in our  
272 samples. Key limb genes known to be involved in pectoral fin development, including  
273 members of the *hoxa* and *hoxd* gene families, *dlx2a*, *dlx5a*, *hand2*, *col2a1a*, *smo*, and  
274 *fgfr1a/fgfr1b*, are significantly downregulated in *prdm1a*<sup>-/-</sup> (**Fig. 5C**), which are required  
275 for induction, patterning, outgrowth, and collagen production (Ahn & Ho, 2008;  
276 Akimenko et al., 1994; Chen et al., 2001; Dale & Topczewski, 2011; Heude et al., 2014;  
277 Leerberg et al., 2019; Yan et al., 1995; Yelon et al., 2000). The most significant  
278 upregulated gene was complement factor 4b (*c4b*), which is part of the classical  
279 activation pathway in the immune system (Janeway et al., 2001). The paralog *prdm1b*  
280 was also upregulated in *prdm1a*<sup>-/-</sup>, suggesting an attempt at genetic compensation.  
281 Gene ontology (GO) pathway enrichment analysis on genes downregulated in *prdm1a*<sup>-/-</sup>  
282 revealed anatomical structure morphogenesis, chromatin remodeling, skeletal system  
283 development, cell differentiation, and transcriptional regulation were among the  
284 pathways most enriched in the downregulated genes (**Fig. 5D**). These pathways were  
285 expected given what we already know about PRDM1 as a transcription factor and  
286 master regulator of differentiation (reviewed in Bikoff et al. (2009)).

287 To validate the RNA-seq data and determine the effect of *prdm1a* loss on gene  
288 expression, we performed real-time quantitative PCR (RT-qPCR) on the anterior half of  
289 embryos at 24 and 48 hpf and hybridization chain reaction (HCR) at 48 hpf for select  
290 genes in wildtype and *prdm1a*<sup>-/-</sup> whole embryos. (**Fig. 6; Fig. S4**). We first probed for  
291 *prdm1a* and *tbx5a*, an early marker of limb initiation. At 48 hpf, *prdm1a* is highly  
292 expressed in the fin mesenchyme and AER of wildtype embryos. In null mutants,  
293 *prdm1a* transcripts are detected throughout the fin bud and at even higher levels than  
294 wildtype, suggesting that the mRNA is not susceptible to nonsense mediated decay at

295 this stage (**Fig. 6**). The cells may be overproducing *prdm1a* transcripts to compensate  
296 for the loss of functional protein. *tbx5a* is highly expressed in the fin mesenchyme of  
297 both wildtype and *prdm1a*<sup>-/-</sup> at 48 hpf with no significant difference (**Fig. 6A-B**). The  
298 intensity of signal in the fin mesenchyme was quantified by measuring the total cell  
299 fluorescence and correcting for area and background (CTCF). Next, Fgf receptors,  
300 *fgfr1a* and *fgfr1b*, were significantly downregulated in the RNA-seq dataset (**Fig. 5C**),  
301 so we looked at the expression of their ligand, *fgf10a*, which has been shown to be  
302 decreased in hypomorphs and morphants (Lee & Roy, 2006; Mercader et al., 2006). In  
303 wildtype embryos, *fgf10a* is highly expressed in the fin mesenchyme, but this is  
304 significantly reduced in *prdm1a*<sup>-/-</sup> (**Fig. 6C-G; Fig. S4A, G**). This was quantified by  
305 measuring the signal intensity along a line drawn from the most proximal to distal point  
306 of the fin bud and normalizing the intensity and distance between 0 and 1 (Fulton et al.,  
307 2020). FGF10 is a marker of limb induction and is known for signaling downstream to  
308 FGF8 in the AER to regulate outgrowth along the proximal distal axis (Ng et al., 2002;  
309 Ohuchi et al., 1997). In *prdm1a*<sup>-/-</sup> embryos, *fgf8a* expression is significantly decreased,  
310 which is consistent with the observed truncated fin phenotype (**Fig. 6H-L Fig. S4L**).  
311 RNA-seq also shows that *dlx5a*, another marker of limb outgrowth, is downregulated  
312 (**Fig. 5C**). By HCR, *dlx5a* is highly expressed in the fin mesenchyme and cleithrum and  
313 is co-expressed with *prdm1a* in AER cells (**Fig. 6M**). Intriguingly, *dlx5a* expression is  
314 decreased in the mesenchyme and cleithrum of *prdm1a*<sup>-/-</sup> but increased in the AER of  
315 *prdm1a*<sup>-/-</sup> (**Fig. 6N-P; S4D, J**). Finally, we probed for sonic hedgehog (*shha*), the  
316 morphogen required for anterior/posterior digit patterning. In the most posterior part of  
317 the fin bud, the zone of polarizing activity (ZPA), there is a significant decrease of *shha*  
318 in *prdm1a*<sup>-/-</sup> (**Fig. 6Q-R**). This was expected in that we also see a downregulation of the  
319 receptor and SHH target *smo* in our RNA-seq dataset (**Fig. 5C**). Our gene expression  
320 results in null *prdm1a*<sup>-/-</sup> mutants are consistent with published studies in mice as well as  
321 morphant and hypomorph *prdm1a*<sup>tp39/tp39</sup> zebrafish studies (Lee & Roy, 2006; Mercader  
322 et al., 2006; Robertson et al., 2007). Together, these data suggest that Prdm1a is  
323 required for regulating FGF signaling in the fin mesenchyme as well as outgrowth and  
324 anterior/posterior patterning in the AER and ZPA.

325 **Prdm1a directly binds to and regulates limb outgrowth genes.**

326           Given that Prdm1a requires its zinc finger domain during pectoral fin  
327 development, we next asked whether Prdm1a directly binds to limb genes that were  
328 identified in the RNA-seq to regulate their expression. We isolated EGFP-positive  
329 pectoral fin cells from *Tg(Mmu:Prx1-EGFP)* wildtype fish at 24 hpf (**Fig. 7A**) and  
330 performed Cleavage Under Targets and Release Using Nuclease (CUT&RUN).  
331 CUT&RUN is a high-resolution, *in situ* method for chromatin profiling and mapping of  
332 protein/DNA interactions, which uses fewer cells than traditional Chromatin  
333 Immunoprecipitation (ChIP) (Meers et al., 2019; Skene & Henikoff, 2017; Ye et al.,  
334 2021). We used antibodies against IgG, H3K27Ac, and Prdm1a (von Hofsten et al.,  
335 2008) and sequenced the samples on the Illumina NovaSEQ 6000 system. We  
336 observed 15,361 Prdm1a-occupied peaks (**Fig. 7B-C; Fig. S5A-B**). Of these, 29.81%  
337 were associated with promoter regions, 10.96% in introns, and 58.81% in distal  
338 intergenic regions (**Fig. 7D; Fig. S5C**). We then subjected the Prdm1a peaks to Gene  
339 ontology (GO) pathway analysis and found enrichment for pathways involved in  
340 transcriptional regulation, such as protein dimerization activity, transcription coregulator  
341 activity, and histone binding (**Fig. 7E**). We also performed motif enrichment analysis  
342 and identified a significant enrichment of Hox transcription factor binding sites. Several  
343 Hox transcription factors are known to be required for pectoral fin development, such as  
344 Hoxd11, Hoxa13, and Hoxa11 (**Fig. 7F; Fig. S5E; Table S3**) (Sordino et al., 1996;  
345 Sordino et al., 1995). To our knowledge, Prdm1a has not yet been shown to interact  
346 with Hox transcription factors. We also mapped Prdm1a binding sites to the nearest  
347 genes and found that Prdm1a directly binds to putative enhancer and promoter regions  
348 of critical limb development genes, including *fgfr1a*, *dlx5a*, *dlx6a*, and *smo* (**Fig. 7G;**  
349 **Fig. S5F**). This is consistent with what is observed in our RNA-seq dataset in that the  
350 expression of these genes is significantly downregulated in *prdm1a*<sup>-/-</sup> compared to  
351 wildtype embryos. The data suggest that Prdm1a directly binds to these genes and  
352 functions as an activator to regulate limb induction, outgrowth, and anterior/posterior  
353 patterning.

354

355

356

357 **DISCUSSION**

358         Approximately 50% of SHFM cases have an unknown genetic cause.  
359 Chromosomal deletions and translocations at 6q21 have long been associated with  
360 SHFM, though a candidate gene has not yet been isolated (Braverman et al., 1993;  
361 Correa-Cerro et al., 1996; Duran-Gonzalez et al., 2007; Gurrieri et al., 1995; Hopkin et  
362 al., 1997; Pandya et al., 1995; Tsukahara et al., 1997; Viljoen & Smart, 1993). In this  
363 study, we identified three novel variants in the gene *PRDM1* in families with SHFM that  
364 segregated with the phenotype or arose *de novo*. PRDM1 has been previously  
365 implicated in vertebrate limb development (Ha & Riddle, 2003; Lee & Roy, 2006;  
366 Mercader et al., 2006; Robertson et al., 2007; Vincent et al., 2005; Wilm & Solnica-  
367 Krezel, 2005), and here we show that *PRDM1* variants can cause SHFM and limb  
368 defects in humans. Each of the three variants is rare, negatively affects the DNA-  
369 binding zinc finger domain of the protein and are damaging as heterozygous alleles. We  
370 have shown through transient overexpression assays in zebrafish that the variants are  
371 not functional compared to wildtype in that they fail to rescue cartilage elements of the  
372 pectoral fins of *prdm1a*<sup>-/-</sup> zebrafish embryos. Our data suggest that they are pathogenic  
373 and led to limb defects in SHFM patients.

374         Using stable, conditional overexpression experiments, we also define the  
375 functional domain of Prdm1a specifically during limb development. PRDM1 consists of a  
376 SET domain at its N-terminus, followed by a pro/ser-rich domain, and five zinc fingers.  
377 PRDM1 can recruit epigenetic modifiers to its domains as well as bind DNA directly to  
378 regulate transcription. We show that Prdm1a requires both its pro/ser-rich and zinc  
379 finger domains for pectoral fin morphogenesis. Deleting either domain fails to rescue the  
380 pectoral fin, while deletion of the SET domain rescues the cleithrum, endoskeletal disk,  
381 scapulocoracoid and postcoracoid. The SET domain of PRDM1 does not have intrinsic  
382 methyltransferase activity *in vivo* and has not been shown to bind with cofactors (Cheng  
383 et al., 2005; Hohenauer & Moore, 2012; Martin & Zhang, 2005). Removing the pro/ser  
384 and zinc finger domains together also fails to rescue, but interestingly, it does not  
385 produce a more severe phenotype. This implies that both domains are required during  
386 pectoral fin development. Prdm1a likely directly binds to DNA with its zinc finger domain  
387 and then recruits cofactors to its pro/ser domain. If Prdm1a cannot bind, then neither

388 can its cofactors. Likewise, binding to the DNA alone cannot repress or induce  
389 expression of that gene.

390 Within the limb GRN, *Prdm1a* has been proposed to act downstream of retinoic  
391 acid signaling and limb initiation and upstream of Fgf signaling to induce limb formation  
392 (Lee & Roy, 2006; Mercader et al., 2006). We performed RNA-seq on isolated pectoral  
393 fin cells and found that there was an almost equal distribution of up and downregulated  
394 genes in *prdm1a*<sup>-/-</sup> compared to wildtype, though all key limb genes were downregulated  
395 (**Fig. 6B-C**). Given that *Prdm1a* is traditionally considered a gene repressor, it is  
396 surprising that the genes known to be involved in limb development were all  
397 downregulated in *prdm1a*<sup>-/-</sup>, including Fgf receptors, *col2a1a*, *dlx2a*, *dlx5a*, *smo*, and  
398 *hoxa/hoxd* genes (Ahn & Ho, 2008; Akimenko et al., 1994; Chen et al., 2001; Dale &  
399 Topczewski, 2011; Heude et al., 2014; Leerberg et al., 2019; Yan et al., 1995; Yelon et  
400 al., 2000). Using HCR, we demonstrate that *prdm1a*<sup>-/-</sup> pectoral fins exhibit a significant  
401 decrease in important limb genes, namely *fgf10a*, *fgf8a*, *dlx5a*, and *shha*. We propose  
402 that during limb induction, *Prdm1a* promotes mesenchymal cell outgrowth and  
403 patterning by activating FGF receptor, *fgfr1a*. Binding of Fgf10a to this receptor then  
404 leads to downstream activation of *fgf8a* in the AER. Fgf8a initiates a positive feedback  
405 loop and maintains expression of *fgf10a* for sustained limb growth (Ng et al., 2002;  
406 Ohuchi et al., 1997). Fgf8a is also known to participate in initiation of SHH expression in  
407 the mesoderm and ZPA, which is responsible for anterior/posterior patterning (Crossley  
408 et al., 1996). Decreased expression of *fgf8a* subsequently leads to lower levels of *shha*  
409 in *prdm1a*<sup>-/-</sup> (**Fig. 8**). Our data suggests that *Prdm1a* is necessary for initiating limb  
410 induction in the fin mesenchyme and maintenance of outgrowth and patterning genes.

411 *Prdm1a* has traditionally been known as a repressor, and it was initially thought  
412 that *Prdm1a* regulates Fgf signaling and the ensuing cascade by blocking the  
413 expression of an inhibitor of *fgf10a* transcription (Mercader et al., 2006). However, in  
414 this study, we show that *Prdm1a* directly binds to and regulates its receptor, *fgfr1a*,  
415 suggesting that it is *activating* Fgf signaling. We also show that *Prdm1a* directly binds to  
416 *smo* and activates anterior/posterior patterning. Its role as an activator is uncommon,  
417 though not novel. We have previously shown that *Prdm1a* directly activates genes, such  
418 as *tfap2* and *foxd3*, during zebrafish neural specification (Powell et al., 2013). More

419 recently, it has been shown to interact with Kdm4a, a histone demethylase, to activate  
420 chick neural, neural crest, and sensory specification genes (Prajapati et al., 2019).  
421 Given that its traditional cofactors are repressors, i.e., HDAC1/2, Groucho proteins,  
422 LSD1, Prmt5 (Ancelin et al., 2006; Ren et al., 1999; Su et al., 2009; Yu et al., 2000), it is  
423 unlikely that Prdm1a is binding with these factors during the activation of these  
424 particular limb genes. However, “chromatin modification” was one of the most  
425 downregulated pathways in *prdm1a*<sup>-/-</sup> from our GO Pathway Enrichment analysis of the  
426 RNA-seq dataset (**Fig. 5D**), and “transcription coregulator activity” was enriched in the  
427 CUT&RUN dataset (**Fig. 7E**). Motif analysis of Prdm1a bound peaks predicts  
428 enrichment of Hox transcription factor motifs, including Hoxd11, Hoxa13, and Hoxa11,  
429 that are known to be required for pectoral fin development (**Fig. 7F**) (Sordino et al.,  
430 1996; Sordino et al., 1995). We also hypothesize that Prdm1a may be acting with  
431 Kdm4a to directly activate *fgfr1a* and *smo*, though additional experiments are needed to  
432 determine this or uncover other cofactors.

433 One of the more interesting genes to emerge from our transcriptomic and  
434 CUT&RUN analyses was *dlx5a*, a homeodomain transcription factor known to cause  
435 SHFM Type I (Crackower et al., 1996; Scherer et al., 1994; Wang et al., 2014). In our  
436 HCR assays we show that at 48 hpf, *prdm1a*<sup>-/-</sup> exhibit decreased expression of *dlx5a* in  
437 the mesenchyme, but increased expression in the AER where *prdm1a* is also co-  
438 expressed (**Fig. 6M, N**). Given that *DLX5* mutations lead to SHFM Type I (MIM  
439 #225300) (Crackower et al., 1996; Scherer et al., 1994; Wang et al., 2014) and that  
440 *dlx5a* is directly regulated by Prdm1a, we asked whether there is a genetic interaction  
441 between the two genes. We crossed a hypomorphic allele *dlx5a*<sup>*j1073Et*</sup> (referred to as  
442 *Tg(dlx5a:EGFP)*) (Talbot et al., 2010) to *prdm1a*<sup>+/-</sup> fish, intercrossed the double  
443 heterozygous animals, and performed cartilage staining on the resulting larvae at 4 dpf.  
444 *dlx5a* morphants have pectoral fin defects that vary in severity (Heude et al., 2014).  
445 Interestingly, *Tg(dlx5a:EGFP)* heterozygotes and homozygotes do not have overt  
446 pectoral fin defects at this stage (**Fig. S6C, E**). When combined with *prdm1a*<sup>-/-</sup>, we found  
447 that the length of the endoskeletal disk and the area of the scapulocoracoid and  
448 postcoracoid were slightly increased and trending towards a rescue; however, the  
449 results were not significant (**Fig. S6D, F, H, J**). The partial loss of Dlx5a could have

450 helped balance the high expression in the AER of *prdm1a*<sup>-/-</sup> and rescue pectoral fin  
451 outgrowth, but, because it is a hypomorph, it may have been too weak to produce a  
452 more drastic rescue. In addition, expression of *dlx5a* in the cleithrum was significantly  
453 decreased in *prdm1a*<sup>-/-</sup> (**Fig. 6M, O**). The cleithrum is part of the shoulder girdle in bony  
454 fishes. It is located at the border between the neural crest-derived pharyngeal arches,  
455 which give rise to the craniofacial skeleton, and the mesodermal pectoral fin. Because  
456 of its position, some have hypothesized that, like the clavicle in mammals, the cleithrum  
457 may be composed of both neural crest (NC) and mesodermal cells (Matsuoka et al.,  
458 2005). This could have important implications in human disease in that craniofacial and  
459 limb defects often co-occur, including in SHFM (reviewed in Gurrieri and Everman  
460 (2013); Truong and Artinger (2021)). Although there is currently no evidence that NC  
461 cells contribute to the cleithrum (Kague et al., 2012), NC cells have been labeled in gill  
462 pillar cells of zebrafish (Mongera et al., 2013) as well as the posterior gill arches of the  
463 little skate (*Leucoraja erinacea*) (Sleight & Gillis, 2020). The gill arches are  
464 hypothesized to give rise to paired fins in jawed vertebrates, implying a serial homology  
465 between the two structures (Gegenbaur, 1878; Sleight & Gillis, 2020). Given the  
466 importance of Prdm1a in the pharyngeal arches and now the pectoral fin, it is interesting  
467 to speculate whether the two structures are connected (Artinger et al., 1999; Birkholz et  
468 al., 2009; Ha & Riddle, 2003; Lee & Roy, 2006; Mercader et al., 2006; Robertson et al.,  
469 2007; Roy & Ng, 2004; Vincent et al., 2005; Wilm & Solnica-Krezel, 2005).

470 In summary, we have identified novel variants in *PRDM1* that result in SHFM  
471 phenotypes and limb defects in humans. Variants affecting the protein's ability to recruit  
472 cofactors and bind to DNA are detrimental for proper limb formation. We show that  
473 Prdm1a directly binds to *fgfr1a*, *dlx5a*, *dlx6a*, and *smo* during limb development and its  
474 ability to do so is critical for proper outgrowth and patterning (**Fig. 8**). This work is  
475 important for our understanding of the limb GRN and underscores the pathogenicity of  
476 human variants in *PRDM1*.

477

478

479

480



## 481 **MATERIALS & METHODS**

### 482 **Zebrafish husbandry**

483 Zebrafish were maintained as previously described (Westerfield, 2000). The  
484 wildtype (WT) strain used was AB (ZIRC) and the mutant lines used were *prdm1a*<sup>m805</sup>  
485 (*nrd*; referred to as *prdm1a*<sup>-/-</sup>) (Artinger et al., 1999; Hernandez-Lagunas et al., 2005)  
486 and *dlx5a*<sup>j1073Et</sup> (referred to as *Tg(dlx5a:EGFP)*) (Talbot et al., 2010). Embryos were  
487 staged following published standards as described (Kimmel et al., 1995). All  
488 experiments were reviewed and approved by the Institutional Animal Care and Use  
489 Committee (IACUC) at the University of Colorado Denver Anschutz Medical Campus  
490 and conform to the NIH regulatory standards of care and treatment.

### 491 **SHFM Patient Ascertainment**

492 SHFM individuals were seen in the clinic due to a history of non-syndromic limb  
493 and digit malformations. X-ray and pedigree analyses indicated a diagnosis of non-  
494 syndromic SHFM with dominant inheritance but variable penetrance for each. In  
495 addition to testing for common variants associated with SHFM, standard chromosomal  
496 karyotyping and microarray were performed but did not reveal any abnormalities. In  
497 SHFM family #1 (*PRDM1c.712\_713insT*) DNA derived from whole blood was used to  
498 perform whole exome sequencing, which identified variants in the *PRDM1* gene.  
499 Targeted sequencing for *PRDM1* was then performed on an additional 75 unrelated  
500 SHFM patients seen at the clinic, which identified two additional variants.

### 501 **DNA extraction, exome sequencing, and analysis**

502 Exome sequencing was performed at the University of Washington Center for  
503 Mendelian Genomics (UW-CMG). Briefly, library construction and exome capture were  
504 done using an automated 96-well plate format (Perkin-Elmer Janus II). 500ng of  
505 genomic DNA was subjected to a series of shotgun library construction steps, including  
506 fragmentation through acoustic sonication (Covaris), end-polishing and A-tailing, ligation  
507 of sequencing adaptors, and PCR amplification with dual 8 bp barcodes for multiplexing.  
508 Libraries underwent exome capture using the Roche/Nimblegen SeqCap EZ v2.0 (~36.5  
509 MB target). Prior to sequencing, the library concentration was determined by  
510 fluorometric assay and molecular weight distributions verified on the Agilent Bioanalyzer  
511 (consistently 150 ± 15bp). Barcoded exome libraries were pooled using liquid handling

512 robotics prior to clustering (Illumina cBot) and loading. Massively parallel sequencing-  
513 by-synthesis with fluorescently labeled, reversibly terminating nucleotides is carried out  
514 on the HiSeq sequencer. Variant detection and genotyping were performed using the  
515 HaplotypeCaller (HC) tool from GATK (3.7). Variant data for each sample were  
516 formatted (variant call format [VCF]) as “raw” calls that contain individual genotype data  
517 for one or multiple samples and flagged using the filtration walker (GATK) to mark sites  
518 that are of lower quality/false positives [e.g., low quality scores (Q50), allelic imbalance  
519 (ABHet 0.75), long homopolymer runs (HRun > 3), and/or low quality by depth (QD < 5)].

520 Coding variants were filtered by selecting variants that have <0.005 minor allele  
521 frequency (MAF) in any population in the Genome Aggregation Database (gnomAD).  
522 Further selection was performed by selecting rare single nucleotide variants (SNVs) that  
523 were considered damaging by at least two bioinformatics tools in dbNSFP (Liu et al.,  
524 2016). For indels, bioinformatics analysis was performed using MutationTaster  
525 (Schwarz et al., 2010).

#### 526 **SHFM Patient Sanger sequencing**

527 PRDM1 variants were confirmed by Sanger sequencing using BigDye Terminator  
528 v3.1 Cycle Sequencing kit on an ABI3100 automatic DNA Analyzer (Applied  
529 BioSystems) following manufacturer’s instructions. The alignment and analysis of the  
530 sequences were done using the DNASTAR program (Lasergene).

#### 531 **Alcian blue cartilage staining**

532 Zebrafish were stained for cartilage as previously described (Walker & Kimmel,  
533 2007). In short, 4 dpf larvae were fixed in 2% paraformaldehyde (PFA) at room  
534 temperature for one hour. Larvae were then washed in 100mM Tris (pH 7.5)/10mM  
535 MgCl<sub>2</sub> before rocking overnight at room temperature in Alcian blue stain (pH 7.5)  
536 (0.04% Alcian Blue, 80% ethanol, 100mM Tris [pH 7.5], 10mM MgCl<sub>2</sub>). Larvae were  
537 destained and rehydrated in a series of ethanol washes (80%, 50%, 25%) containing  
538 100mM Tris (pH 7.5) and 10mM MgCl<sub>2</sub>, and then bleached for 10 minutes in 3%  
539 H<sub>2</sub>O<sub>2</sub>/0.5% KOH. Finally, larvae were rinsed twice in 25% glycerol/0.1% KOH to remove  
540 the bleach and stored at 4°C in 50% glycerol/0.1% KOH. The pectoral fins of stained  
541 larvae were dissected, flat mounted in 50% glycerol/0.1 KOH, and imaged on an  
542 Olympus BX51 WI microscope. Measurements of the pectoral fin were performed

543 blindly in ImageJ, averaged for each individual, and then compared using a one-way  
544 ANOVA followed by a Tukey's post-hoc test relative to uninjected *prdm1a*<sup>-/-</sup> mutants.

#### 545 **mRNA overexpression in zebrafish**

546 *hPRDM1* variant cDNA was synthesized into a pCS2+ backbone using Gateway  
547 cloning. cDNA was linearized and transcribed using the mMessage mMachine T7  
548 Transcription Kit (ThermoFisher). *prdm1a*<sup>+/-</sup> fish were intercrossed and the different  
549 *hPRDM1* mRNA variants (diluted 1:10 in water and phenol red) were injected into  
550 resulting embryos at the single-cell stage. At 4 dpf, larvae were collected for Alcian blue  
551 staining.

#### 552 **Hybridization chain reaction (HCR) V3.0 and quantification**

553 Probes for *prdm1a*, *fgf10a*, *fgf8a*, *dlx5a*, *tbx5a*, and *shh* were purchased from  
554 Molecular Instruments ([www.molecularinstruments.com](http://www.molecularinstruments.com)). Whole mount HCR was  
555 performed according to the manufacturer's instructions with minor modifications (Choi et  
556 al., 2016; Choi et al., 2018). Embryos were fixed overnight at 4°C in 4% PFA, washed in  
557 PBS, and dehydrated and permeabilized in two 10-minute washes in 100% MeOH at  
558 room temperature. Embryos were stored for at least 24 hours at -20°C in fresh MeOH. A  
559 graded series of MeOH/PBST solutions was used to rehydrate the embryos (75%, 50%,  
560 25%, 0%). Embryos were then treated with proteinase K (10 µg/mL) for 5 minutes (24  
561 hpf) or 15 minutes (48 hpf), washed twice in PBST, fixed for 20 minutes in 4% PFA, and  
562 then washed five times in PBST. Following hybridization with the probe solution, the  
563 probes were saved and stored at -20°C for future use. Likewise, following the  
564 amplification stage, hairpins were saved and stored at -20°C. Recycled hairpins were  
565 heated to 95°C for 90 seconds and cooled (Bruce et al., 2021). Embryos were stored in  
566 PBS at 4°C protected from light. Whole embryos were mounted in 0.2% low melt  
567 agarose and imaged on a Leica SP8 Confocal at 10x and 40x magnification. Embryos  
568 were then genotyped following Rossi et al. (2009) with slight modifications. Following  
569 DNA extraction, PCR was performed in M buffer (2mM MgCl<sub>2</sub>, 13.7 mM Tris-HCl [pH  
570 8.4], 68.4mM KCl, 0.001% gelatin, 1.8 mg/mL protease-free BSA, 136 µM each  
571 dATP/CTP/GTP/TTP) with GoTaq Flexi (Promega) and digested overnight in Fok1  
572 enzyme at 37°C.

573 HCR images were first processed by performing the “rolling ball” background  
574 subtraction (50 pixels) on the sum slice projection in ImageJ (Sternberg, 1983). Signal  
575 intensity for *tbx5a* and *shha* was quantified by calculating the corrected total cell  
576 fluorescence (CTCF). Average fluorescence intensity was calculated as:

$$\text{CTCF} = \text{Integrated cell density} - (\text{Area of signal} * \text{Mean fluorescence of background})$$

577 An independent, unpaired *t* test was performed to compare the CTCF and the area of  
578 expression in wildtype/heterozygotes compared to *prdm1a*<sup>-/-</sup> mutants. Signal intensity  
579 for *fgf10a*, *fgf8a*, *dlx5a*, and *prdm1a* was quantified using the line tool in ImageJ as  
580 previously described (Fulton et al., 2020). A line was drawn from the most proximal end  
581 of the pectoral fin to the most distal tip. Signal intensity along the 30-pixel wide line was  
582 measured. The length of the fin was normalized between 0 and 1, with 0 representing  
583 the most proximal end and 1 being distal, for each individual. The signal intensity was  
584 normalized for each gene by calculating a Z-score ( $z = \frac{x-\min}{\max-\min}$ ). The average signal  
585 intensity along the line, the maximum intensity, and length of expression are shown.  
586 The definition of *n* varies for each experiment and is specified in the figure legends.  
587 Figures are 3D max projections of lateral views of the pectoral fin. Background was  
588 subtracted using the rolling ball feature in ImageJ (50 pixels).

### 589 **RNA Isolation for RT-qPCR**

590 Total RNA was isolated from pooled wildtype/heterozygous and *prdm1a*<sup>-/-</sup> mutant  
591 embryos after removal of the trunk at 24 and 48 hpf with TRIzol reagent (Invitrogen) and  
592 phenol/chloroform (5-10 embryo heads). RNA (500 ng) was reverse transcribed to  
593 cDNA with SuperScript III First-Strand Synthesis System (Invitrogen) for real-time  
594 quantitative PCR (RT-qPCR). Taqman primers for *prdm1a*, *fgf10a*, *fgf8a*, *dlx5a*, *dlx6a*,  
595 *tp63*, *fgf24*, and *b-actin* were purchased from Thermo Fisher Scientific. *b-actin* was  
596 used as the zebrafish internal control. Reactions were performed in at least three  
597 biological and technical replicates. Transcript abundance and relative fold change were  
598 quantified using the 2<sup>-ΔΔCt</sup> method relative to control. Relative expression was  
599 compared using an unpaired, independent *t* test.

### 600 **Molecular cloning**

601 A full-length open reading frame of *prdm1a* was amplified from cDNA as  
602 previously described (Hernandez-Lagunas et al., 2005). Amplicons were gel extracted

603 using the Zymoclean Gel DNA Recovery Kit (Zymo Research) and recombined into the  
604 pDONR221 plasmid using BP Clonase II following the manufacturer's instructions  
605 (Invitrogen) (Kwan et al., 2007). Sequences were confirmed with Sanger sequencing.

606 To delete the different protein domains of Prdm1a, unique restriction digest sites  
607 were introduced into the *pME-prdm1a* construct using the QuikChange Lightning Multi  
608 Site-Directed Mutagenesis Kit (Agilent Technologies). Primer sequences were designed  
609 using the QuikChange Primer Design Program and are included in **Table S2**. Domain  
610 deletions were modeled after *in vitro* studies described previously (Ancelin et al., 2006;  
611 Gyory et al., 2004; Su et al., 2009; Yu et al., 2000). XhoI and Sall sites were introduced  
612 to flank the SET domain; AatII sites surrounded the proline/serine rich domain; XbaI  
613 sites flanked the zinc finger domain; and XbaI sites flanked the proline/serine rich  
614 domain and zinc finger domain. Following an overnight restriction digest at 37°C with  
615 the proper enzyme, fragments were run on a 1% agarose gel, extracted, and ligated  
616 without the deleted Prdm1a domain using T4 DNA ligase (New England Biolabs)  
617 overnight at 16°C. The enzyme was inactivated at 65°C for 10 minutes before 2.5µL of  
618 the reaction was transformed into DH5α cells. Sequences were confirmed by Sanger  
619 sequencing. If sequences were out of frame, additional nucleotides were  
620 reinserted/deleted using the QuikChange Lightning kit and then resequenced (**Table**  
621 **S2**).

622 To generate *Tg(hsp70l:gal4FF)*, p5E-*hsp70l* (gift from Dr. Brian Ciruna), pME-  
623 *gal4FF* (Asakawa et al., 2008), and p3E-*polyA* were recombined into a pDestTol2CG2  
624 destination vector using Gateway LR Clonase II (Invitrogen) (Kwan et al., 2007). The  
625 UAS constructs were created by recombining p5E-4*XnrUAS*, pME-*prdm1a* variations,  
626 and p3E-2a-*EGFP* into pDestTol2pA2 using LR Clonase II (Akitake et al., 2011; Kwan  
627 et al., 2007). Sequences were confirmed with Sanger sequencing.

## 628 **Transgenesis**

629 Transposase mRNA was synthesized as previously described (Kawakami et al.,  
630 2004). To generate the *Tg(hsp70l:gal4FF)<sup>co1025Tg</sup>* fish, embryos were injected at the  
631 single-cell stage with 37.5 pg of the transgene, 28.7 pg of Tol2 mRNA, and 150 mM  
632 KCl. Embryos were screened for EGFP expression in the heart at 24-72 hpf, grown to  
633 adulthood, and outcrossed to *prdm1a*<sup>+/-</sup> fish to generate stable F1 lines. Two

634 independent *Tg(hsp70l:gal4FF); prdm1a<sup>+/-</sup>* lines were maintained. These lines were  
635 incrossed for microinjections to generate *prdm1a<sup>-/-</sup>* mutants.

636 The Tol2 plasmid for generation of the *Tg(MmuPrx1:EGFP)<sup>co1026Tg</sup>* fish that label  
637 the pectoral fin with EGFP was a generous gift from Dr. Koji Tamura (Hernandez-Vega  
638 & Minguillon, 2011; Yano & Tamura, 2013). Embryos were injected at the single-cell  
639 stage with 60 pg of transgene, 28.7 pg of Tol2 mRNA, and 150 mM KCl. Embryos were  
640 screened for EGFP expression at 24-72 hpf, grown to adulthood, and outcrossed to WT  
641 to generate stable F1 lines. Two independent *Tg(MmuPrx1:EGFP)* lines with similar  
642 expression were maintained.

### 643 **Global heat shock experiments**

644 *Tg(hsp70l:gal4FF);prdm1a<sup>+/-</sup>* fish were intercrossed and injected at the single-cell  
645 stage with 75 pg of the *4XnrUAS* construct, 19.1 pg of Tol2 mRNA, and 150 mM KCl.  
646 Following microinjection, embryos were heat shocked at 37°C for 60 minutes at 6 hpf.  
647 Embryos were returned to the incubator at 28.5°C to recover overnight. Embryos were  
648 then screened for mosaic EGFP expression at 24 hpf (**Fig. 6B-E**).

### 649 **Fluorescence-activated cell sorting (FAC)**

650 EGFP-positive pectoral fin cells were isolated from zebrafish embryos using  
651 fluorescence-activated cell (FAC) sorting. *Tg(MmuPrx1:EGFP)* embryos were collected  
652 at 24 hpf (CUT&RUN) and 48 hpf (RNA-seq) and digested in Pronase (1 mg/mL)  
653 (Roche) for 5-6 minutes to remove the chorion. Embryos were pooled together, washed  
654 in DPBS (Gibco), and dissociated in Accumax (Innovative Cell Technologies) and  
655 DNase I (50 units/100 embryos) (Roche) at 31°C for 1.5 hours. Cells were homogenized  
656 every 8 minutes by pipetting up and down using pipet tips decreasing in size. Cells were  
657 washed in solution (300 units DNase I in 4 mL DPBS) before filtering through a 70 µM  
658 nylon mesh cell strainer (Fisher Scientific) into 50 mL conical tubes pre-coated with 5%  
659 fetal bovine serum. Cells were spun down, resuspended in basic sorting buffer (1mM  
660 EDTA, 25mM HEPES [pH 7.0], 1% FBS in DPBS), stained with DAPI (1:1000), and  
661 FAC sorted on the MoFlo XDP100 sorter with a 100 µM nozzle tip.

### 662 **CUT&RUN**

663 Following the FAC sort, cleave under targets and release using nuclease  
664 (CUT&RUN) was performed on 150,000+ sorted EGFP-positive pectoral fin cells at 24

665 hpf as previously described (Shull et al., 2022; Skene & Henikoff, 2017). Briefly, cells  
666 were incubated on activated Concanavalin A conjugated paramagnetic beads  
667 (EpiCypher) at room temperature for 10 minutes. Cells were washed in Antibody Buffer  
668 (20mM HEPES, pH 7.5; 150 mM NaCl; 0.5 mM Spermidine [Invitrogen], 1X Complete-  
669 Mini Protease Inhibitor tablet [Roche Diagnostics]; 0.01% Digitonin [Sigma-Aldrich]; 2  
670 mM EDTA) and incubated overnight at 4°C with rotation in the respective antibody (IgG  
671 [1:100; Jackson ImmunoResearch, 111-005-003, RRID: AB\_2337913], H3K27ac [1:66;  
672 Cell Signaling Technology, 4353S, RRID: AB10545273], and Prdm1a [1:33; rabbit  
673 polyclonal antibody from Dr. Phillip Ingham (von Hofsten et al., 2008) (Powell et al.,  
674 2013)]). Excess antibody was removed by washing in cold Digitonin Buffer (20 mM  
675 HEPES, pH 7.5; 150 mM NaCl; 0.5 mM Spermidine; 1X Complete-Mini Protease  
676 Inhibitor tablet). Cells were then incubated with pAG-MNase (EpiCypher) for 10 minutes  
677 at room temperature and washed with Digitonin Buffer. Cells were rotated in 100 mM  
678 CaCl<sub>2</sub> at 4°C for two hours before the Stop Buffer (340 mM NaCl, 20 mM EDTA, 4 mM  
679 EGTA, 50 µg/ml RNaseA , 50 µg/ml glycogen) was added for 10 minutes at 37°C  
680 without the *E.coli* spike-in. DNA fragments were purified with a DNA Clean &  
681 Concentrate Kit (Zymo Research). Eluted DNA fragments were amplified using the  
682 NEBNext Ultra II DNA Library Prep Kit for Illumina (New England Biolabs) following the  
683 manufacturer's instructions. Amplification of DNA was performed following guidelines  
684 outlined by EpiCypher: 98°C 45s, [98°C 15s, 60°C 10s] x14 cycles, 72°C 1 min.  
685 Samples were subjected to paired end 150 bp sequencing on the Illumina NovaSEQ  
686 6000 system at Novogene Corporation Inc. (Sacramento, CA). CUT&RUN experiments  
687 were performed in duplicate for two biological replicates.

### 688 **RNA-sequencing**

689 About 150-300 *Tg(MmuPrx1:EGFP);prdm1a<sup>-/-</sup>* (sorted by pigment phenotype  
690 (Artinger et al., 1999; Hernandez-Lagunas et al., 2005)) and *Tg(MmuPrx1:EGFP)*  
691 wildtype embryos were dissected at 48 hpf to remove the brain before FAC sorting.  
692 RNA from sorted cells was extracted using the RNAqueous™-Micro Total RNA Isolation  
693 Kit (ThermoFisher) following the manufacturer's instructions for cultured cells. DNase  
694 treatment was performed. A library was prepared using the NEBNext Ultra II Directional  
695 RNA Library Kit for Illumina (New England Biolabs) following the manufacturer's

696 instructions. Samples were subjected to sequencing on the Illumina NovaSEQ 6000  
697 system at Novogene Corporation Inc. (Sacramento, CA) at a depth of over 20 million  
698 reads per sample. RNA-seq experiments were performed in duplicate for two biological  
699 replicates per genotype.

## 700 **Bioinformatics Analysis**

701 *CUT&RUN*. Analysis was adapted from (Ye et al., 2021). Following sequencing,  
702 paired reads were trimmed using Cutadapt (Martin, 2011). Trimmed reads were aligned  
703 to the zebrafish genome (danRer11) using Bowtie2 version 2.4.5 with the following  
704 options: --end-to-end --very-sensitive --no-mixed --no-discordant --no-unal (Langmead &  
705 Salzberg, 2012). Peak calling was performed using MACS2 2.2.7.1 using the default  
706 settings (Zhang et al., 2008), and heatmaps, bigwig tracks, and other statistics were  
707 generated with deepTools (Ramírez et al., 2014). Motif enrichment analysis was  
708 performed on peak files (bed files) using HOMER v.4.11 (Heinz et al., 2010) and the  
709 findMotifsGenome.pl script. Called peaks were annotated and subjected to GO term  
710 analysis using the ChIPseeker R package with the seq2gene function (Yu et al., 2015).  
711 Replicates were analyzed separately. There was variability between the two replicates,  
712 but they were comparable and showed similar trends.

713 *RNA-seq*. Following sequencing, paired reads were trimmed and mapped to the  
714 zebrafish genome (danRer11) assembly using Spliced Transcripts alignment to a  
715 Reference (STAR) v.2.7.10b (Dobin et al., 2013). Aligned counts per gene were  
716 calculated using featureCounts (Liao et al., 2014). Differential expression between  
717 wildtype and *prdm1a*<sup>-/-</sup> was calculated using the DESeq2 package (Love et al., 2014).  
718 The top 250 differentially expressed genes by padj were plotted onto a heatmap using  
719 the pheatmap R package ([https://cran.r-](https://cran.r-project.org/web/packages/pheatmap/index.html)  
720 [project.org/web/packages/pheatmap/index.html](https://cran.r-project.org/web/packages/pheatmap/index.html)). Gene lists were analyzed for  
721 functional annotation using GO enrichment analysis based on PANTHER Classification  
722 System (Ashburner et al., 2000; Gene Ontology, 2021; Mi et al., 2019).

723



724 **ACKNOWLEDGEMENTS**

725 We thank members of the K.B.A laboratory for project feedback; Dr. Chris Johnson for  
726 making the *pME-prdm1a* construct; Dr. Koji Tamura for the *MmuPrx1-EGFP* plasmid;  
727 Dr. Brian Ciruna for the *p5E-hsp70l* construct; the lab of Dr. David Clouthier for cloning  
728 advice; the lab of Dr. Jamie Nichols for providing the *Tg(dlx5a:EGFP)* line; the lab of Dr.  
729 Bruce Appel for various Tol2 constructs; Dr. Lee Niswander for critically reviewing the  
730 manuscript; Christine Archer and the zebrafish fish facility team for excellent animal  
731 care; Dr. Dmitry Baturin with the University of Colorado Cancer Center Flow Cytometry  
732 Shared Resource for help with FAC sorting; Dr. Philip Ingham for the Prdm1a polyclonal  
733 antibody; Cindy Skinner for coordinating the patient studies; Dr. Elizabeth Blue and Dr.  
734 Michael Bamshad for help exome sequencing through the University of Washington  
735 Center for Mendelian Genomics (UW-CMG); and the SHFM families for participation in  
736 the study.

737

738 **COMPETING INTERESTS**

739 We have no conflicts to declare.

740

741 **AUTHOR CONTRIBUTIONS**

742 Conceptualization: B.T.T., C. S., H. F-S., K.B.A.; Experimentation: B.T.T., L.C.S.;  
743 Patient acquisition/identification of variants/sequencing: M.F., E.G.B., C.S., D.E., UW-  
744 CMG; Formal analysis: B.T.T., E. L.; Writing original draft: B.T.T., K.B.A.; Funding  
745 acquisition: B.T.T., C.S., H. F-S., K.B.A. Supervision: K.B.A. All authors reviewed and  
746 edited the manuscript.

747

748 **FUNDING**

749 This work is supported by the Eunice Kennedy Shriver National Institute of Child Health  
750 and Human Development (NICHD) (1F31HD103368 to B.T.T. and 1R03HD096320-  
751 01A1 to K.B.A.). Exome sequencing by the UW-CMG was funded by the National  
752 Human Genome Research Institute (NHGRI) and the National Heart, Lung, and Blood  
753 Institute (NHLBI) (UM1 HG006493 and U24 HG008956). The content is solely the

754 responsibility of the authors and does not necessarily represent the official views of the  
755 National Institutes of Health.

756

757 **DATA AVAILABILITY**

758 The RNA-seq and CUT&RUN data have been deposited in NCBI's Gene Expression  
759 Omnibus and are accessible through accession number GSE217486

760 (<https://www.ncbi.nlm.nih.gov/geo/query/acc.cgi?acc=GSE217486>).

761

## REFERENCES

- 762  
763  
764 Agarwal, P., Wylie, J. N., Galceran, J., Arkhitko, O., Li, C., Deng, C., Grosschedl, R., &  
765 Bruneau, B. G. (2003, Feb). *Tbx5* is essential for forelimb bud initiation following  
766 patterning of the limb field in the mouse embryo. *Development*, 130(3), 623-633.  
767 <https://doi.org/10.1242/dev.00191>  
768
- 769 Ahn, D., & Ho, R. (2008). Tri-phasic expression of posterior *Hox* genes during  
770 development of pectoral fins in zebrafish: implications for the evolution of  
771 vertebrate paired appendages. *Dev Biol*, 322(1), 220-233.  
772 <https://doi.org/10.1016/j.ydbio.2008.06.032>  
773
- 774 Akimenko, M., Ekker, M., Wegner, J., Lin, W., & Westerfield, M. (1994). Combinatorial  
775 Expression of Three Zebrafish Genes Related to *Distal-Less*: Part of Homeobox  
776 Gene Code for the Head. *J Neurosci*, 14(6), 3475-3486.  
777 <https://www.jneurosci.org/content/jneuro/14/6/3475.full.pdf>  
778
- 779 Akitake, C. M., Macurak, M., Halpern, M. E., & Goll, M. G. (2011). Transgenerational  
780 analysis of transcriptional silencing in zebrafish. *Dev Biol*, 352(2), 191-201.  
781 <https://doi.org/10.1016/j.ydbio.2011.01.002>  
782
- 783 Ancelin, K., Lange, U. C., Hajkova, P., Schneider, R., Bannister, A. J., Kouzarides, T., &  
784 Surani, M. A. (2006, Jun). Blimp1 associates with Prmt5 and directs histone  
785 arginine methylation in mouse germ cells. *Nat Cell Biol*, 8(6), 623-630.  
786 <https://doi.org/10.1038/ncb1413>  
787
- 788 Artinger, K. B., Chitnis, A. B., Mercola, M., & Driever, W. (1999, Sep). Zebrafish  
789 narrowminded suggests a genetic link between formation of neural crest and  
790 primary sensory neurons. *Development*, 126(18), 3969-3979.  
791 <http://www.ncbi.nlm.nih.gov/pubmed/10457007>  
792
- 793 Asakawa, K., Suster, M. L., Mizusawa, K., Nagayoshi, S., Kotani, T., Urasaki, A.,  
794 Kishimoto, Y., Hibi, M., & Kawakami, K. (2008, Jan 29). Genetic dissection of  
795 neural circuits by Tol2 transposon-mediated Gal4 gene and enhancer trapping in  
796 zebrafish. *Proc Natl Acad Sci U S A*, 105(4), 1255-1260.  
797 <https://doi.org/10.1073/pnas.0704963105>  
798
- 799 Ashburner, M., Ball, C., Blake, J., Botstein, D., Butler, H., Cherry, J., Davis, A., Dolinski,  
800 K., Dwight, S., Eppig, J., Harris, M., Hill, D., Issel-Tarver, L., Kasarskis, A., Lewis,  
801 S., Matese, J., Richardson, J., Ringwald, M., Rubin, G., & Sherlock, G. (2000).  
802 Gene ontology: tool for the unification of biology. The Gene Ontology  
803 Consortium. *Nat Genet*, 25. <https://doi.org/10.1038/7556>  
804
- 805 Bakkers, J., Hild, M., Kramer, C., Furutani-Seiki, M., & Hammerschmidt, M. (2002).  
806 Zebrafish  $\Delta$ Np63 Is a Direct Target of Bmp Signaling and Encodes a  
807 Transcriptional Repressor Blocking Neural Specification in the Ventral Ectoderm.

- 808 *Developmental Cell*, 2(5), 617-627. [https://doi.org/https://doi.org/10.1016/S1534-](https://doi.org/https://doi.org/10.1016/S1534-5807(02)00163-6)  
809 [5807\(02\)00163-6](https://doi.org/https://doi.org/10.1016/S1534-5807(02)00163-6)  
810
- 811 Baxendale, S., Davison, C., Muxworthy, C., Wolff, C., Ingham, P. W., & Roy, S. (2004,  
812 Jan). The B-cell maturation factor Blimp-1 specifies vertebrate slow-twitch  
813 muscle fiber identity in response to Hedgehog signaling. *Nat Genet*, 36(1), 88-93.  
814 <https://doi.org/10.1038/ng1280>  
815
- 816 Bikoff, E. K., Morgan, M. A., & Robertson, E. J. (2009, Aug). An expanding job  
817 description for Blimp-1/PRDM1. *Curr Opin Genet Dev*, 19(4), 379-385.  
818 <https://doi.org/10.1016/j.gde.2009.05.005>  
819
- 820 Birkholz, D. A., Olesnicky Killian, E. C., George, K. M., & Artinger, K. B. (2009, Oct).  
821 Prdm1a is necessary for posterior pharyngeal arch development in zebrafish.  
822 *Dev Dyn*, 238(10), 2575-2587. <https://doi.org/10.1002/dvdy.22090>  
823
- 824 Braverman, N., Kline, A., & Pyeritz, R. (1993). Interstitial deletion of 6q associated with  
825 ectrodactyly. *Am J Hum Genet*, 53(410).  
826
- 827 Bruce, H. S., Jerz, G., Kelly, S. R., McCarthy, J., Pomerantz, A., Senevirathne, G.,  
828 Sherrard, A., Sun, D. A., Wolff, C., & Patel, N. H. (2021). Hybridization Chain  
829 Reaction (HCR) In Situ Protocol. *protocols.io*.  
830 <https://doi.org/10.17504/protocols.io.bunznvf6>  
831
- 832 Castillo-Fernandez, J., Spector, T., & Bell, J. (2014). Epigenetics of discordant  
833 monozygotic twins: implications for disease *Genome Med*, 6(7), 1-16.  
834 <https://doi.org/10.1186/s13073-014-0060-z>  
835
- 836 Chen, W., Burgess, S., & Hopkins, N. (2001). Analysis of the zebrafish *smoothened*  
837 mutant reveals conserved and divergent functions of hedgehog activity.  
838 *Development*, 128(12), 2385-2396. <https://doi.org/10.1242/dev.128.12.2385>  
839
- 840 Cheng, X., Collins, R. E., & Zhang, X. (2005). Structural and Sequence Motifs of Protein  
841 (Histone) Methylation Enzymes. *Annu Rev Biophys Biomol Struct*, 34, 267-294.  
842 <https://doi.org/10.1146/annurev.biophys.34.040204.144452>  
843
- 844 Choi, H. M., Calvert, C. R., Husain, N., Huss, D., Barsi, J. C., Deverman, B. E., Hunter,  
845 R. C., Kato, M., Lee, S. M., Abelin, A. C., Rosenthal, A. Z., Akbari, O. S., Li, Y.,  
846 Hay, B. A., Sternberg, P. W., Patterson, P. H., Davidson, E. H., Mazmanian, S.  
847 K., Prober, D. A., van de Rijn, M., Leadbetter, J. R., Newman, D. K., Readhead,  
848 C., Bronner, M. E., Wold, B., Lansford, R., Sauka-Spengler, T., Fraser, S. E., &  
849 Pierce, N. A. (2016, Oct 1). Mapping a multiplexed zoo of mRNA expression.  
850 *Development*, 143(19), 3632-3637. <https://doi.org/10.1242/dev.140137>  
851
- 852 Choi, H. M. T., Schwarzkopf, M., Fornace, M. E., Acharya, A., Artavanis, G., Stegmaier,  
853 J., Cunha, A., & Pierce, N. A. (2018, Jun 26). Third-generation in situ

- 854 hybridization chain reaction: multiplexed, quantitative, sensitive, versatile, robust.  
855 *Development*, 145(12). <https://doi.org/10.1242/dev.165753>  
856
- 857 Corallo, D., Schiavinato, A., Trapani, V., Moro, E., Argenton, F., & Bonaldo, P. (2013).  
858 Emilin3 is required for notochord sheath integrity and interacts with Scube2 to  
859 regulate notochord-derived Hedgehog signals. *Development*, 140(22), 4594-  
860 4601. <https://doi.org/https://doi.org/10.1242/dev.094078>  
861
- 862 Correa-Cerro, L., Garcia-Cruz, D., Diaz-Castanos, L., Figuera, L., & Sanchez-Corona,  
863 J. (1996). Interstitial deletion 6q16.2q22.2 in a child with ectrodactyl. *Ann Genet*,  
864 39(2), 105-109.  
865
- 866 Crackower, M., Scherer, S., Rommens, J., Hui, C., Poorkaj, P., Soder, S., Cobben, J.,  
867 Hudgins, L., Evans, J., & Tsui, L. (1996). Characterization of the split hand/split  
868 foot malformation locus SHFM1 at 7q21.3-q22.1 and analysis of a candidate  
869 gene for its expression during limb development. *Hum Mol Genet*, 5(5), 571-579.  
870 <https://doi.org/https://doi.org/10.1093/hmg/5.5.571>  
871
- 872 Crossley, P., Minowada, G., MacArthur, C., & Martin, G. R. (1996). Roles for FGF8 in  
873 the Induction, Initiation, and Maintenance of Chick Limb Development. *Cell*,  
874 84(1), 127-136. [https://doi.org/https://doi.org/10.1016/S0092-8674\(00\)80999-X](https://doi.org/https://doi.org/10.1016/S0092-8674(00)80999-X)  
875
- 876 Dale, R., & Topczewski, J. (2011). Identification of an evolutionary conserved regulatory  
877 element of the zebrafish *col2a1a* gene. *Dev Biol*, 357(2), 518-531.  
878 <https://doi.org/10.1016/j.ydbio.2011.06.020>  
879
- 880 Dobin, A., Davis, C., Schlesinger, F., Drenkow, J., Zale, C., Jha, S., Batut, P., Chaisson,  
881 M., & Gingeras, T. (2013). STAR: ultrafast universal RNA-seq aligner.  
882 *Bioinformatics*, 29(1), 15-21. <https://doi.org/10.1093/bioinformatics/bts635>  
883
- 884 Duran-Gonzalez, J., Gutierrez-Angulo, M., Garcia-Cruz, D., de la Luz Ayala, M., Padilla,  
885 M., & Davalos, I. (2007). A de novo interstitial 6q deletion in a boy with a split  
886 hand malformation. *J Appl Genet*, 48(4), 405-407.  
887 <https://doi.org/10.1007/BF03195240>  
888
- 889 Fog, C. K., Galli, G. G., & Lund, A. H. (2011). PRDM proteins: Important players in  
890 differentiation and disease. *Bioessays*, 34, 50-60.  
891 <https://doi.org/10.1002/bies.201100107>  
892
- 893 Fulton, T., Trivedi, V., Attardi, A., Anlas, K., Dingare, C., Arias, A. M., & Steventon, B.  
894 (2020, Aug 3). Axis Specification in Zebrafish Is Robust to Cell Mixing and  
895 Reveals a Regulation of Pattern Formation by Morphogenesis. *Curr Biol*, 30(15),  
896 2984-2994 e2983. <https://doi.org/10.1016/j.cub.2020.05.048>  
897
- 898 Gegenbaur, C. (1878). *Elements of Comparative Anatomy*. Macmillan.  
899

- 900 Gene Ontology, C. (2021, Jan 8). The Gene Ontology resource: enriching a GOld mine.  
901 *Nucleic Acids Res*, 49(D1), D325-D334. <https://doi.org/10.1093/nar/gkaa1113>  
902
- 903 Gordon, L., Joo, J. E., Powell, J. E., Ollikainen, M., Novakovic, B., Li, X., Andronikos,  
904 R., Cruickshank, M. N., Conneely, K. N., Smith, A. K., Alisch, R. S., Morley, R.,  
905 Visscher, P. M., Craig, J. M., & Saffery, R. (2012, Aug). Neonatal DNA  
906 methylation profile in human twins is specified by a complex interplay between  
907 intrauterine environmental and genetic factors, subject to tissue-specific  
908 influence. *Genome Res*, 22(8), 1395-1406. <https://doi.org/10.1101/gr.136598.111>  
909
- 910 Grandel, H., Lun, K., Rauch, G.-J., Rhinn, M., Piotrowski, T., Houart, C., Sordino, P.,  
911 Kuchler, A. M., Schulte-Merker, S., Geisler, R., Holder, N., Wilson, S. W., &  
912 Brand, M. (2002). Retinoic acid signalling in the zebrafish embryo is necessary  
913 during pre-segmentation stages to pattern the anterior-posterior axis of the CNS  
914 and to induce a pectoral fin bud. *Development*, 129(12), 2851-2865.  
915 <https://dev.biologists.org/content/develop/129/12/2851.full.pdf>  
916
- 917 Grandel, H., & Schulte-Merker, S. (1998). The development of the paired fins in the  
918 Zebrafish (*Danio rerio*). *Mechanisms of Development*, 79, 99-120.  
919 [https://doi.org/https://doi.org/10.1016/S0925-4773\(98\)00176-2](https://doi.org/https://doi.org/10.1016/S0925-4773(98)00176-2)  
920
- 921 Gurrieri, F., & Everman, D. B. (2013, Nov). Clinical, genetic, and molecular aspects of  
922 split-hand/foot malformation: an update. *Am J Med Genet A*, 161A(11), 2860-  
923 2872. <https://doi.org/10.1002/ajmq.a.36239>  
924
- 925 Gurrieri, F., Genuardi, M., & Pomponi, M. G. (1995). Ulnar ray defect in an infant with a  
926 6q21;7q31.2 translocation: Further evidence for the existence of a limb defect  
927 gene in 6q21. *Am J Hum Genet*, 55(3).  
928 <https://doi.org/https://doi.org/10.1002/ajmq.1320550314>  
929
- 930 Gyory, I., Wu, J., Fejer, G., Seto, E., & Wright, K. L. (2004, Mar). PRDI-BF1 recruits the  
931 histone H3 methyltransferase G9a in transcriptional silencing. *Nat Immunol*, 5(3),  
932 299-308. <https://doi.org/10.1038/ni1046>  
933
- 934 Ha, A. S., & Riddle, R. D. (2003). cBlimp-1 expression in chick limb bud development.  
935 *Gene Expression Patterns*, 3(3), 297-300. [https://doi.org/10.1016/s1567-  
936 133x\(03\)00042-5](https://doi.org/10.1016/s1567-133x(03)00042-5)  
937
- 938 Heinz, S., Benner, C., Spann, N., Bertolino, E., Lin, Y., Laslo, P., Cheng, J., Murre, C.,  
939 Singh, H., & Glass, C. (2010). Single combinations of lineage-determining  
940 transcription factors prime cis-regulatory elements required for macrophage and B  
941 cell identities. *Mol Cell*, 38(4), 576-589.  
942 <https://doi.org/10.1016/j.molcel.2010.05.004>  
943
- 944 Hernandez-Lagunas, L., Choi, I. F., Kaji, T., Simpson, P., Hershey, C., Zhou, Y., Zon,  
945 L., Mercola, M., & Artinger, K. B. (2005, Feb 15). Zebrafish narrowminded

- 946 disrupts the transcription factor *prdm1* and is required for neural crest and  
947 sensory neuron specification. *Dev Biol*, 278(2), 347-357.  
948 <https://doi.org/10.1016/j.ydbio.2004.11.014>  
949
- 950 Hernandez-Vega, A., & Minguillon, C. (2011, Aug). The *Prx1* limb enhancers: targeted  
951 gene expression in developing zebrafish pectoral fins. *Dev Dyn*, 240(8), 1977-  
952 1988. <https://doi.org/10.1002/dvdy.22678>  
953
- 954 Heude, E., Shaikho, S., & Ekker, M. (2014). The *dlx5a/dlx6a* genes play essential roles  
955 in the early development of zebrafish median fin and pectoral structures. *PLoS*  
956 *One*, 9(5), e98505. <https://doi.org/10.1371/journal.pone.0098505>  
957
- 958 Hohenauer, T., & Moore, A. W. (2012, Jul). The *Prdm* family: expanding roles in stem  
959 cells and development. *Development*, 139(13), 2267-2282.  
960 <https://doi.org/10.1242/dev.070110>  
961
- 962 Hopkin, R. J., Schorry, E., Bofinger, M., Milatovich, A., Stern, H., Jayne, C., & Saal, H.  
963 M. (1997). New insights into the phenotypes of 6q deletions. *Am J Hum Genet*,  
964 70(4), 377-386.  
965
- 966 Janeway, C., Travers, P., & Walport, M. (2001). *Immunobiology: The Immune System in*  
967 *Health and Disease* (5th ed.). Garland Science.  
968 <https://www.ncbi.nlm.nih.gov/books/NBK27100/>  
969
- 970 Kague, E., Gallagher, M., Burke, S., Parsons, M., Franz-Odenaal, T., & Fisher, S.  
971 (2012). Skeletogenic Fate of Zebrafish Cranial and Trunk Neural Crest. *PLoS*  
972 *One*, 7(11), 1-13. <https://doi.org/https://doi.org/10.1371/journal.pone.0047394>  
973
- 974 Kantaputra, P. N., & Carlson, B. M. (2019, Jan). Genetic regulatory pathways of split-  
975 hand/foot malformation. *Clin Genet*, 95(1), 132-139.  
976 <https://doi.org/10.1111/cge.13434>  
977
- 978 Kawakami, K., Takeda, H., Kawakami, N., Kobayashi, M., Matsuda, N., & Mishina, M.  
979 (2004, Jul). A transposon-mediated gene trap approach identifies  
980 developmentally regulated genes in zebrafish. *Dev Cell*, 7(1), 133-144.  
981 <https://doi.org/10.1016/j.devcel.2004.06.005>  
982
- 983 Keller, A. D., & Maniatis, T. (1992). Only Two of the Five Zinc Fingers of the Eukaryotic  
984 Transcriptional Repressor PRDI-BF1 are Required for Sequence-Specific DNA  
985 Binding. *Molecular and Cellular Biology*, 12(5), 1940-1949.  
986 <https://mcb.asm.org/content/mcb/12/5/1940.full.pdf>  
987
- 988 Kimmel, C. B., Ballard, W. W., Kimmel, S. R., Ullmann, B., & Schilling, T. F. (1995).  
989 Stages of Embryonic Development of the Zebrafish. *Developmental Dynamics*,  
990 203, 253-310. <https://doi.org/10.1002/aja.1002030302>  
991

- 992 Kwan, K. M., Fujimoto, E., Grabher, C., Mangum, B. D., Hardy, M. E., Campbell, D. S.,  
993 Parant, J. M., Yost, H. J., Kanki, J. P., & Chien, C. B. (2007, Nov). The Tol2kit: a  
994 multisite gateway-based construction kit for Tol2 transposon transgenesis  
995 constructs. *Dev Dyn*, 236(11), 3088-3099. <https://doi.org/10.1002/dvdy.21343>  
996
- 997 Langmead, B., & Salzberg, S. (2012). Fast gapped-read alignment with Bowtie 2. *Nat*  
998 *Methods*, 9, 357-359. <https://doi.org/https://doi.org/10.1038/nmeth.1923>  
999
- 1000 Lee, B. C., & Roy, S. (2006, Dec 15). Blimp-1 is an essential component of the genetic  
1001 program controlling development of the pectoral limb bud. *Dev Biol*, 300(2), 623-  
1002 634. <https://doi.org/10.1016/j.ydbio.2006.07.031>  
1003
- 1004 Leerberg, D. M., Hopton, R. E., & Draper, B. W. (2019, Aug). Fibroblast Growth Factor  
1005 Receptors Function Redundantly During Zebrafish Embryonic Development.  
1006 *Genetics*, 212(4), 1301-1319. <https://doi.org/10.1534/genetics.119.302345>  
1007
- 1008 Liao, Y., Smyth, G. K., & Shi, W. (2014). featureCounts: an efficient general purpose  
1009 program for assigning sequence reads to genomic features. *Bioinformatics*,  
1010 30(7), 923-930. <https://doi.org/https://doi.org/10.1093/bioinformatics/btt656>  
1011
- 1012 Liu, X., Li, C., Mou, C., Dong, Y., & Tu, Y. (2020, Dec 2). dbNSFP v4: a comprehensive  
1013 database of transcript-specific functional predictions and annotations for human  
1014 nonsynonymous and splice-site SNVs. *Genome Med*, 12(1), 103.  
1015 <https://doi.org/10.1186/s13073-020-00803-9>  
1016
- 1017 Liu, X., Wu, C., Li, C., & Boerwinkle, E. (2016, Mar). dbNSFP v3.0: A One-Stop  
1018 Database of Functional Predictions and Annotations for Human Nonsynonymous  
1019 and Splice-Site SNVs. *Hum Mutat*, 37(3), 235-241.  
1020 <https://doi.org/10.1002/humu.22932>  
1021
- 1022 Love, M. I., Huber, W., & Anders, S. (2014). Moderated estimation of fold change and  
1023 dispersion for RNA-seq data with DESeq2. *Genome Biol*, 15(12), 550.  
1024 <https://doi.org/10.1186/s13059-014-0550-8>  
1025
- 1026 Martin, C., & Zhang, Y. (2005). The diverse functions of histone lysine methylation.  
1027 *Nature Reviews Molecular Cell Biology*, 6, 838-849.  
1028 <https://doi.org/https://doi.org/10.1038/nrm1761>  
1029
- 1030 Martin, M. (2011, 2011-05-02). Cutadapt removes adapter sequences from high-  
1031 throughput sequencing reads [next generation sequencing; small RNA;  
1032 microRNA; adapter removal]. 2011, 17(1), 3. <https://doi.org/10.14806/ej.17.1.200>  
1033
- 1034 Matsuoka, T., Ahlberg, P., Kessar, N., Iannarelli, P., Dennehy, U., Richardson, W.,  
1035 McMahan, A. P., & Koentges, G. (2005). Neural Crest Origins of the Neck and  
1036 Shoulder. *Nature*, 436(7049), 347-355. <https://doi.org/10.1038/nature03837>  
1037



- 1038 Meers, M. P., Bryson, T. D., Henikoff, J. G., & Henikoff, S. (2019, Jun 24). Improved  
1039 CUT&RUN chromatin profiling tools. *Elife*, 8. <https://doi.org/10.7554/eLife.46314>  
1040
- 1041 Mercader, N., Fischer, S., & Neumann, C. J. (2006, Aug). Prdm1 acts downstream of a  
1042 sequential RA, Wnt and Fgf signaling cascade during zebrafish forelimb  
1043 induction. *Development*, 133(15), 2805-2815. <https://doi.org/10.1242/dev.02455>  
1044
- 1045 Mi, H., Muruganujan, A., Ebert, D., Huang, X., & Thomas, P. D. (2019). PANTHER  
1046 version 14: more genomes, a new PANTHER GO — slim and improvements in  
1047 enrichment analysis tools. *Nucleic Acids Res*, 47(D1), D419-D426.  
1048 <https://doi.org/http://doi.org/10.1093/nar/gky1038>  
1049
- 1050 Milanetto, M., Tiso, N., Braghetta, P., Volpin, D., Argenton, F., & Bonaldo, P. (2007).  
1051 Emilin genes are duplicated and dynamically expressed during zebrafish  
1052 embryonic development. *Dev Dyn*, 237(1), 222-232.  
1053 <https://doi.org/https://doi.org/10.1002/dvdy.21402>  
1054
- 1055 Mongera, A., Singh, A., Levesque, M., Chen, Y., Konstantinidis, P., & Nüsslein-Volhard,  
1056 C. (2013). Genetic lineage labeling in zebrafish uncovers novel neural crest  
1057 contributions to the head, including gill pillar cells. *Development*, 140(4), 916-  
1058 925. <https://doi.org/http://doi.org/10.1241/dev.091066>  
1059
- 1060 Ng, J. K., Kawakami, Y., Buscher, D., Raya, A., Itoh, T., Koth, C. M., Rodriguez  
1061 Esteban, C., Rodriguez-Leon, J., Garrity, D. M., Fishman, M. C., & Izpisua  
1062 Belmonte, J. C. (2002). The limb identity gene *Tbx5* promotes limb initiation by  
1063 interacting with *Wnt2b* and *Fgf10*. *Development*, 129, 5161-5170.  
1064 <http://dev.biologists.org/content/129/22/5161>  
1065
- 1066 Ohuchi, H., Nakagawa, T., Yamamoto, A., Araga, A., Ohata, T., Ishimaru, T., Yoshioka,  
1067 H., Kuwana, T., Nohno, T., Yamasaki, M., Itoh, N., & Noji, S. (1997). The  
1068 mesenchymal factor, FGF10, initiates and maintains the outgrowth of the chick  
1069 limb bud through interaction with FGF8, an apical ectodermal factor.  
1070 *Development*, 124, 2235-2244.  
1071 <http://dev.biologists.org/content/124/11/2235.article-info>  
1072
- 1073 Pandya, A., Braverman, N., Pyeritz, R., Ying, K., Kline, A., & Falk, R. (1995). Interstitial  
1074 deletion of the long arm of chromosome 6 associated with unusual limb  
1075 anomalies: Report of two new patients and review of the literature. *Am J Hum*  
1076 *Genet*, 59(1), 38-43. <https://doi.org/10.1002/ajmg.1320590109>  
1077
- 1078 Powell, D. R., Hernandez-Lagunas, L., LaMonica, K., & Artinger, K. B. (2013, Aug).  
1079 Prdm1a directly activates foxd3 and tfap2a during zebrafish neural crest  
1080 specification. *Development*, 140(16), 3445-3455.  
1081 <https://doi.org/10.1242/dev.096164>  
1082

- 1083 Prajapati, R. S., Hintze, M., & Streit, A. (2019). PRDM1 controls the sequential  
1084 activation of neural, neural crest and sensory progenitor determinants by  
1085 regulating histone modification. *Development*, 146.  
1086 <https://doi.org/10.1242/dev.181107>  
1087
- 1088 Ramírez, F., Dündar, F., Diehl, S., Grüning, B., & Manke, T. (2014). deepTools: a  
1089 flexible platform for exploring deep-sequencing data. *Nucleic Acids Res*, 42(W1),  
1090 W187-W191. <https://doi.org/http://doi.org/10.1093/nar/gku365>  
1091
- 1092 Ren, B., Chee, K. J., Kim, T. H., & Maniatis, T. (1999). PRDI-BF1/Blimp-1 repression is  
1093 mediated by corepressors of the Groucho family of proteins. *Genes &*  
1094 *Development*, 13, 125-137.  
1095 <https://www.ncbi.nlm.nih.gov/pmc/articles/PMC316372/>  
1096
- 1097 Riddle, R. D., Johnson, R. L., Laufer, E., & Tabin, C. (1993). *Sonic hedgehog* Mediates  
1098 the Polarizing Activity of the ZPA. *Cell*, 75, 1401-1416.  
1099 [https://doi.org/https://doi.org/10.1016/0092-8674\(93\)90626-2](https://doi.org/https://doi.org/10.1016/0092-8674(93)90626-2)  
1100
- 1101 Robertson, E. J., Charatsi, I., Joyner, C. J., Koonce, C. H., Morgan, M., Islam, A.,  
1102 Paterson, C., Lejsek, E., Arnold, S. J., Kallies, A., Nutt, S. L., & Bikoff, E. K.  
1103 (2007, Dec). Blimp1 regulates development of the posterior forelimb, caudal  
1104 pharyngeal arches, heart and sensory vibrissae in mice. *Development*, 134(24),  
1105 4335-4345. <https://doi.org/10.1242/dev.012047>  
1106
- 1107 Rossi, C. C., Kaji, T., & Artinger, K. B. (2009, Apr). Transcriptional control of Rohon-  
1108 Beard sensory neuron development at the neural plate border. *Dev Dyn*, 238(4),  
1109 931-943. <https://doi.org/10.1002/dvdy.21915>  
1110
- 1111 Roy, S., & Ng, T. (2004). Blimp-1 specifies neural crest and sensory neuron progenitors  
1112 in the zebrafish embryo. *Curr Biol*, 14, 1772-1777.  
1113 <https://doi.org/10.1016/j.cub.2004.09.046> (1772)  
1114
- 1115 Roy, S., Wolff, C., & Ingham, P. W. (2001). The *u-boot* mutation identifies a Hedgehog-  
1116 regulated myogenic switch for fiber-type diversification in the zebrafish embryo.  
1117 *Genes & Development*, 15, 1563-1576. <https://doi.org/10.1101/gad.195801>  
1118
- 1119 Saunders, J. W., & Gasseling, M. T. (1968). *Ectodermal-mesenchymal interactions in*  
1120 *the origin of limb symmetry* (R. Fleischmajer & R. F. Billingham, Eds.). Williams &  
1121 Wilkins.  
1122
- 1123 Scherer, S., Poorkaj, P., Massa, H., Soder, S., Allen, T., Nunes, M., Geshurl, D., Wong,  
1124 E., Belloni, E., Little, S., Zhou, L., Becker, D., Kere, J., Ignatius, J., Nllkawa, N.,  
1125 Fukushlma, Y., Hasegawa, T., Weissenbach, J., Boncinelli, E., Trask, B., Tsui,  
1126 L., & Evans, J. (1994). Physical mapping of the split hand/split foot locus on  
1127 chromosome 7 and implication in syndromic ectrodactyly. *Hum Mol Genet*, 3(8),  
1128 1345-1354. <https://doi.org/http://doi.org/10.1093/hmg/3.8.1345>

- 1129  
1130 Schwarz, J. M., Rödelsperger, C., Schuelke, M., & Seelow, D. (2010). MutationTaster  
1131 evaluates disease-causing potential of sequence alterations. *Nat Methods*, 7,  
1132 575-576. <https://doi.org/https://doi.org/10.1038/nmeth0810-575>  
1133
- 1134 Shull, L. C., Lencer, E. S., Kim, H. M., Goyama, S., Kurokawa, M., Costello, J. C.,  
1135 Jones, K., & Artinger, K. B. (2022, Feb 15). PRDM paralogs antagonistically  
1136 balance Wnt/beta-catenin activity during craniofacial chondrocyte differentiation.  
1137 *Development*, 149(4). <https://doi.org/10.1242/dev.200082>  
1138
- 1139 Skene, P. J., & Henikoff, S. (2017, Jan 16). An efficient targeted nuclease strategy for  
1140 high-resolution mapping of DNA binding sites. *Elife*, 6.  
1141 <https://doi.org/10.7554/eLife.21856>  
1142
- 1143 Sleight, V. A., & Gillis, J. A. (2020, Nov 17). Embryonic origin and serial homology of gill  
1144 arches and paired fins in the skate, *Leucoraja erinacea*. *Elife*, 9.  
1145 <https://doi.org/10.7554/eLife.60635>  
1146
- 1147 Sordino, P., Duboule, D., & Kondo, T. (1996). Zebrafish *Hoxa* and *Evx-2* genes: cloning,  
1148 developmental expression and implications for the functional evolution of  
1149 posterior *Hox* genes. *Mech Dev*, 59(2), 165-175. [https://doi.org/10.1016/0925-](https://doi.org/10.1016/0925-4773(96)00587-4)  
1150 [4773\(96\)00587-4](https://doi.org/10.1016/0925-4773(96)00587-4)  
1151
- 1152 Sordino, P., van der Hoeven, F., & Duboule, D. (1995). *Hox* gene expression in teleost  
1153 fins and the origin of vertebrate digits. *Nature*, 375(678-681).  
1154 <https://doi.org/https://doi.org/10.1038/375678a0>  
1155
- 1156 Sowinska-Seidler, A., Socha, M., & Jamsheer, A. (2014, Feb). Split-hand/foot  
1157 malformation - molecular cause and implications in genetic counseling. *J Appl*  
1158 *Genet*, 55(1), 105-115. <https://doi.org/10.1007/s13353-013-0178-5>  
1159
- 1160 Sternberg, S. R. (1983). Biomedical Image Processing. *Computer*, 16(1), 22-34.  
1161 <https://doi.org/10.1109/MC.1983.1654163>  
1162
- 1163 Su, S. T., Ying, H. Y., Chiu, Y. K., Lin, F. R., Chen, M. Y., & Lin, K. I. (2009, Mar).  
1164 Involvement of histone demethylase LSD1 in Blimp-1-mediated gene repression  
1165 during plasma cell differentiation. *Mol Cell Biol*, 29(6), 1421-1431.  
1166 <https://doi.org/10.1128/MCB.01158-08>  
1167
- 1168 Talbot, J. C., Johnson, S. L., & Kimmel, C. B. (2010, Aug 1). *hand2* and *Dlx* genes  
1169 specify dorsal, intermediate and ventral domains within zebrafish pharyngeal  
1170 arches. *Development*, 137(15), 2507-2517. <https://doi.org/10.1242/dev.049700>  
1171
- 1172 Truong, B. T., & Artinger, K. B. (2021, Jan 4). The power of zebrafish models for  
1173 understanding the co-occurrence of craniofacial and limb disorders. *Genesis*.  
1174 <https://doi.org/10.1002/dvg.23407>

- 1175  
1176 Tsukahara, M., Yoneda, J., Azuma, R., Nakashima, K., Kito, N., Ouchi, K., & Kanehara,  
1177 Y. (1997). Interstitial deletion of 6q21–q23 associated with split hand. *Am J Hum*  
1178 *Genet*, 69(3). [https://doi.org/10.1002/\(sici\)1096-8628\(19970331\)69:3<268::aid-](https://doi.org/10.1002/(sici)1096-8628(19970331)69:3<268::aid-ajmg10>3.0.co;2-p)  
1179 [ajmg10>3.0.co;2-p](https://doi.org/10.1002/(sici)1096-8628(19970331)69:3<268::aid-ajmg10>3.0.co;2-p).  
1180  
1181 Viljoen, D., & Smart, R. (1993). Split-foot anomaly, microphthalmia, cleft-lip and cleft-  
1182 palate, and mental retardation associated with a chromosome 6;13 translocation.  
1183 *Clin Dysmorphol*, 2(3), 274-277.  
1184  
1185 Vincent, S. D., Dunn, N. R., Sciammas, R., Shapiro-Shalef, M., Davis, M. M., Calame,  
1186 K., Bikoff, E. K., & Robertson, E. J. (2005, Mar). The zinc finger transcriptional  
1187 repressor Blimp1/Prdm1 is dispensable for early axis formation but is required for  
1188 specification of primordial germ cells in the mouse. *Development*, 132(6), 1315-  
1189 1325. <https://doi.org/10.1242/dev.017111>  
1190  
1191 von Hofsten, J., Elworthy, S., Gilchrist, M. J., Smith, J. C., Wardle, F. C., & Ingham, P.  
1192 W. (2008, Jul). Prdm1- and Sox6-mediated transcriptional repression specifies  
1193 muscle fibre type in the zebrafish embryo. *EMBO Rep*, 9(7), 683-689.  
1194 <https://doi.org/10.1038/embo.2008.73>  
1195  
1196 Walker, M., & Kimmel, C. (2007). A two-color acid-free cartilage and bone stain for  
1197 zebrafish larvae. *Biotechnic & Histochemistry*, 82(1), 23-28.  
1198 <https://doi.org/https://doi.org/10.1080/10520290701333558>  
1199  
1200 Wang, X., Xin, Q., Li, L., Li, J., Zhang, C., Rongfang, Q., Qian, C., Zhao, H., Liu, Y.,  
1201 Shan, S., Dang, J., Bian, X., Shao, C., Gong, Y., & Liu, Q. (2014). Exome  
1202 sequencing reveals a heterozygous DLX5 mutation in a Chinese family with  
1203 autosomal-dominant split-hand/foot malformation. *Eur J Hum Genet*, 22(9), 1105-  
1204 1110. <https://doi.org/10.1038/ejhg.2014.7>  
1205  
1206 Westerfield, M. (2000). *The zebrafish book. A guide for the laboratory use of zebrafish*  
1207 *(Danio rerio)* (4 ed.) [Online Book]. University of Oregon Press.  
1208 [https://zfin.org/zf\\_info/zfbook/zfbk.html](https://zfin.org/zf_info/zfbook/zfbk.html)  
1209  
1210 Wilcox, W. R., Coulter, C. P., & Schmitz, M. L. (2015, Jun). Congenital limb deficiency  
1211 disorders. *Clin Perinatol*, 42(2), 281-300, viii.  
1212 <https://doi.org/10.1016/j.clp.2015.02.004>  
1213  
1214 Wilm, T. P., & Solnica-Krezel, L. (2005, Jan). Essential roles of a zebrafish  
1215 prdm1/blimp1 homolog in embryo patterning and organogenesis. *Development*,  
1216 132(2), 393-404. <https://doi.org/10.1242/dev.01572>  
1217  
1218 Yan, Y.-L., Hatta, K., Riggleman, B., & Postlethwait, J. (1995). Expression of a Type II  
1219 Collagen Gene in the Zebrafish Embryonic Axis. *Dev Dyn*, 203, 363-376.

- 1220 <https://anatomypubs.onlinelibrary.wiley.com/doi/epdf/10.1002/aja.1002030308?sr>  
1221 [c=getfttr](https://anatomypubs.onlinelibrary.wiley.com/doi/epdf/10.1002/aja.1002030308?sr)  
1222  
1223 Yano, T., & Tamura, K. (2013, Jan). The making of differences between fins and limbs.  
1224 *J Anat*, 222(1), 100-113. <https://doi.org/10.1111/j.1469-7580.2012.01491.x>  
1225  
1226 Ye, Z., Braden, C. R., Wills, A., & Kimelman, D. (2021, Jun 1). Identification of in vivo  
1227 Hox13-binding sites reveals an essential locus controlling zebrafish brachyury  
1228 expression. *Development*, 148(11). <https://doi.org/10.1242/dev.199408>  
1229  
1230 Yelon, D., Ticho, B., Halpern, M. E., Ruvinsky, I., Ho, R., Silver, L., & Stainier, D. Y.  
1231 (2000). The bHLH transcription factor hand2 plays parallel roles in zebrafish  
1232 heart and pectoral fin development. *Development*, 127(12), 2573-2582.  
1233 <https://doi.org/10.1242/dev.127.12.2573>  
1234  
1235 Yu, G., Wang, L., & He, Q. (2015). ChIPseeker: an R/Bioconductor package for ChIP  
1236 peak annotation, comparison, and visualization. *Bioinformatics*, 31(14), 2382-  
1237 2383. <https://doi.org/http://doi.org/10.1093/bioinformatics/btv145>  
1238  
1239 Yu, J., Angelin-Duclos, C., Greenwood, J., Liao, J., & Calame, K. (2000). Transcriptional  
1240 Repression by Blimp-1 (PRDI-BF1) Involves Recruitment of Histone  
1241 Deacetylase. *Molecular and Cellular Biology*, 20(7), 2592-2603.  
1242 <https://doi.org/10.1128/MCB.20.7.2592-2603.2000>  
1243  
1244 Zhang, Y., Liu, T., Meyer, C. A., Eeckhoute, J., Johnson, D. S., Bernstein, B. E.,  
1245 Nusbaum, C., Myers, R. M., Brown, M., Li, W., & Liu, X. S. (2008). Model-based  
1246 analysis of ChIP-Seq (MACS). *Genome Biol*, 9(9), R137.  
1247 <https://doi.org/10.1186/gb-2008-9-9-r137>  
1248  
1249  
1250

1251 **FIGURES**

1252

1253 **Figure 1. PRDM1 variants of unknown significance identified in families with Split**  
1254 **Hand/Foot Malformation (SHFM).**

1255 (A) Table showing *PRDM1* variants and predictions of pathogenicity based on various  
1256 bioinformatics tools. (B) Schematic of *PRDM1* structure and location of SHFM variants  
1257 identified in human patients. (C) Pedigree for family with *PRDM1* variant #1,  
1258 *c.712\_713insT* (p.C239Lfs\*32). Affected individuals are shaded. Standard pedigree  
1259 symbols are used. The variant is inherited in an autosomal dominant manner with  
1260 incomplete penetrance and variable expressivity. Photographs of individuals in the  
1261 family are also shown. (D) Pedigree for family with *PRDM1* variant #2, *c.1571C>G*  
1262 (p.T524R). (E) Pedigree for family with *PRDM1* variant #3, *c.2455A>G* (p.T819A).  
1263 Abbreviations: CADD, Combined Annotation-Dependent Depletion; fs, frameshift; HD,  
1264 HumDiv; maf, minor allele frequency; MT, MutationTaster; PP2, PolyPhen2; SIFT,  
1265 Sorting Intolerant From Tolerant

1266

1267 **Figure 2. *prdm1a*<sup>-/-</sup> mutants have hypoplastic pectoral fins.** (A) Cartoon of pectoral  
1268 fin bud at 4 dpf. (B, C) Lateral view of whole-mounted embryos after hybridization chain  
1269 reaction (HCR) for *prdm1a* at (B) 24 (n=3) and (C) 48 hpf (n=28). Anterior is to the left.  
1270 Images are 3D max projections of the whole embryo. Background was subtracted using  
1271 the rolling ball feature in ImageJ (50 pixels). Arrows point to the pectoral fin bud. Scale  
1272 bars are 100  $\mu$ m. (D) Schematic of Prdm1a protein. The *prdm1a*<sup>m805/m805</sup> allele causes a  
1273 premature stop codon in the SET domain and is a presumed null (p.W154\*). The  
1274 hypomorphic *prdm1a*<sup>tp39/tp39</sup> allele is a missense mutation in the second zinc finger  
1275 (p.H564R). (E, F) Representative images of Alcian stained pectoral fins for (E)  
1276 wildtype/heterozygous (n=18) and (F) *prdm1a*<sup>-/-</sup> mutants (n=9) at 4 dpf. The average  
1277 length of the (G) cleithrum, (H) endoskeletal disk, (I) fin fold, and (J) the average area of  
1278 the scapulocoracoid/postcoracoid were measured. Averages were compared with an  
1279 unpaired, two-tailed, independent student's t-test. Error bars represent the mean  $\pm$  SD.  
1280 Scale bars are 50  $\mu$ m. Abbreviations: ant, anterior; cl, cleithrum; d, distal; e, eye; ed,  
1281 endoskeletal disk; ff, fin fold; het, heterozygous; hpf, hours post fertilization; MT,

1282 *prdm1a*<sup>-/-</sup> mutant; n, neurons; p, proximal; pc, postcoracoid; pf, pectoral fin; post,  
1283 posterior; sc, scapulocoracoid; WT, wildtype; y, yolk

1284

1285 **Figure 3: Transient overexpression of SHFM *hPRDM1* variants fails to rescue**  
1286 **pectoral fin in *prdm1a*<sup>-/-</sup> mutants.**

1287 *prdm1a*<sup>+/-</sup> heterozygous fish were intercrossed and injected with the *hPRDM1* wildtype  
1288 and SHFM variant mRNA at the single-cell stage. Injected larvae were collected at 4 dpf  
1289 for Alcian blue staining. **(A-F)** Representative images of Alcian stained pectoral fins at 4  
1290 dpf. **(A)** Uninjected wildtype/heterozygous (n=18). **(B)** Uninjected *prdm1a*<sup>-/-</sup> mutant  
1291 (n=9). *prdm1a*<sup>-/-</sup> mutants were injected with **(C)** wildtype *hPRDM1* (n=10), **(D)**  
1292 *hPRDM1*(p.C239Lfs\*32) (n=10), **(E)** *hPRDM1*(p.T524R) (n=8), or *hPRDM1*(p.T819A)  
1293 mRNA (n=7). Measurements for the length of the **(G)** cleithrum, **(H)** endoskeletal disk,  
1294 and **(I)** fin fold and **(J)** the area of the scapulocoracoid and postcoracoid were averaged  
1295 and compared using a one-way ANOVA, followed by a Tukey post-hoc test relative to  
1296 uninjected *prdm1a*<sup>-/-</sup> mutants. Error bars represent the mean ± SD. Scale bars are 50  
1297 μm. Abbreviations: cl, cleithrum; d, distal; ed, endoskeletal disk; ff, fin fold; het,  
1298 heterozygous; hpf, hours post fertilization; MT, *prdm1a*<sup>-/-</sup> mutant; p, proximal; pc,  
1299 postcoracoid; sc, scapulocoracoid; WT, wildtype

1300

1301 **Figure 4: Overexpression of *Prdm1a* using a global heat shock Gal4/UAS system**  
1302 **shows proline/serine-rich and zinc finger domains are required for pectoral fin**

1303 **function. (A)** Schematic of *4XnrUAS-modified prdm1a-2a-EGFP* constructs that were  
1304 injected into *Tg(hsp70l:gal4FF);prdm1a*<sup>+/-</sup> intercrosses. Results for the ability to rescue  
1305 the pectoral fin are shown. **(B)** Experimental design for heat shock Gal4/UAS rescue  
1306 experiments. Following injection with the *UAS* construct, embryos at 6 hpf (shield stage)  
1307 are heat shocked, leading to activation of Gal4, expression of the *4XnrUAS-modified*  
1308 *prdm1a-2a-EGFP* construct, and cleavage of the 2a viral peptide from EGFP. Embryos  
1309 were screened for mosaic EGFP expression at 24 hpf. **(C-D)** Representative images of  
1310 24 hpf embryos injected with the *4XnrUAS-modified prdm1a-2a-EGFP* construct at the  
1311 single-cell stage. **(C)** No heat shock (control). **(D)** Mosaic EGFP expression in embryos  
1312 injected and heat shocked. The dotted line marks the pectoral fin. Scale bars are 200

1313  $\mu\text{m}$ . **(E-K)** Representative images of Alcian stained pectoral fins at 4 dpf are shown. **(E)**  
1314 Uninjected wildtype (n=36). **(F)** Uninjected *prdm1a*<sup>-/-</sup> mutants (n=11). Mutants were  
1315 injected with constructs containing **(G)** full-length Prdm1a (n=9), **(H)** Prdm1a $\Delta$ SET  
1316 (n=7), **(I)** Prdm1a $\Delta$ P/S (n=13), **(J)** Prdm1a $\Delta$ Znf (n=7), **(K)** Prdm1a $\Delta$ P/S&Znf (n=13), and  
1317 **(L)** an EGFP negative control (n=16). Scale bars are 50  $\mu\text{m}$ . Measurements were taken  
1318 for the length of the **(M)** cleithrum, **(N)** endoskeletal disk, and **(O)** fin fold and **(P)** the  
1319 area of the scapulocoracoid and postcoracoid. Measurements for each individual were  
1320 averaged and compared using a one-way ANOVA, followed by a Tukey's post-hoc test  
1321 relative to uninjected, heat shocked *prdm1a*<sup>-/-</sup> mutants. Error bars represent the mean  $\pm$   
1322 SD. Abbreviations:  $\Delta$ , deleted; ant, anterior; cl, cleithrum; d, distal; dpf, days post  
1323 fertilization; e, eye; ed, endoskeletal disk; ff, fin fold; hpf, hours post fertilization; MT,  
1324 *prdm1a*<sup>-/-</sup> mutant; p, proximal; pc, postcoracoid; pf, pectoral fin; post, posterior; sc,  
1325 scapulocoracoid; WT, wildtype; y, yolk

1326

1327 **Figure 5: Loss of Prdm1a leads to downregulation of important limb development**  
1328 **genes in the pectoral fin.**

1329 RNA-seq was performed on isolated pectoral fin cells from wildtype and *prdm1a*<sup>-/-</sup>  
1330 embryos at 48 hpf. **(A)** Lateral and **(A')** dorsal view of EGFP-positive pectoral fins from  
1331 *Tg(MmuPrx1-EGFP)* zebrafish line at 48 hpf before FAC sorting. Dotted lines indicate  
1332 where the embryos were dissected prior to the FAC sort. Scale bars are 200  $\mu\text{m}$ . **(B)**  
1333 Heat map of top 250 differentially expressed genes (padj) between wildtype and  
1334 *prdm1a*<sup>-/-</sup>. **(C)** Volcano plot showing spread of differentially genes in pectoral fins of  
1335 *prdm1a*<sup>-/-</sup> compared to wildtype. Light blue dots are significant, differentially expressed  
1336 genes ( $-\log_{10}$  p-value $\geq$ 1.15). Purple dots are downregulated, selected genes of interest,  
1337 while yellow dots are upregulated. **(D)** Downregulated genes in *prdm1a*<sup>-/-</sup> were  
1338 subjected to GO (Panther) Pathway Enrichment Analysis. Yellow arrows highlight  
1339 pathways of interest. Abbreviations: a, anterior; DEG, differentially expressed genes; e,  
1340 eye; p, posterior; pf, pectoral fin; y, yolk

1341

1342 **Figure 6: Prdm1a acts downstream of limb initiation and regulates FGF signaling**  
1343 **in the fin mesenchyme required for outgrowth and anterior/posterior patterning.**



1344 (A, C, H, M, Q) Lateral views of pectoral fins from whole-mount wildtype and *prdm1a*<sup>-/-</sup>  
1345 mutant embryos after hybridization reaction (HCR) was performed at 48 hpf. (A) *tbx5a*  
1346 (limb initiation) and *prdm1a* expression (n=8 WT, n=6 *prdm1a*<sup>-/-</sup>). (B) Quantification of  
1347 *tbx5a* expression using corrected total cell fluorescence (CTCF). (C) *fgf10a* (limb  
1348 induction) and *prdm1a* expression (n=6 for each genotype). (D-E) Quantification of (D)  
1349 *fgf10a* and (E) *prdm1a* expression along a line drawn from the most proximal to the  
1350 most distal point of the fin bud using the line scan tool on ImageJ. Intensity and distance  
1351 were normalized between 0 and 1. (F) Maximum normalized intensity of *fgf10a*. (G)  
1352 Length of the fin as measured by *fgf10a* gene expression. (H) *fgf8a* (AER outgrowth  
1353 marker) and *prdm1a* expression (n=6 for each genotype). (I-J) Quantification of (I) *fgf8a*  
1354 and (J) *prdm1a* expression along a line drawn from the most proximal to the most distal  
1355 point of the fin bud. (K) Maximum normalized intensity of *fgf8a*. (L) Length of the fin as  
1356 measured by *fgf8a* gene expression. (M) *dlx5a* (outgrowth marker) and *prdm1a*  
1357 expression (n=3 WT, n=4 *prdm1a*<sup>-/-</sup>). (N-O) Quantification of (N) *dlx5a* and (O) *prdm1a*  
1358 expression along a line drawn from the most proximal to the most distal point of the fin  
1359 bud. (P) Length of the cleithrum. (Q) *shha* (anterior/posterior patterning) and *prdm1a*  
1360 expression (n=8 for each genotype). (R) Expression of *shha* was quantified using  
1361 CTCF. Scale bars are 50 μm. Solid lines in line intensity graphs represent the mean ±  
1362 SD. Statistical comparisons were made using unpaired, two-tailed, independent  
1363 student's t-test. All images are 3D max projections of lateral views of the pectoral fin.  
1364 Background was subtracted using the rolling ball feature in ImageJ (50 pixels).  
1365 Abbreviations: AER, apical ectodermal ridge; CTCF, corrected total cell fluorescence; d,  
1366 distal; hpf, hours post fertilization; p, proximal; ZPA, zone of polarizing activity

1367  
1368 **Figure 7: Prdm1a directly binds to and regulates limb genes.** (A) Lateral view of  
1369 EGFP-positive pectoral fins from Tg(*MmuPrx1-EGFP*) zebrafish line at 24 hpf before  
1370 CUT&RUN was performed. Scale bar is 200 μm. (B-C) Coverage heatmaps of (B)  
1371 H3K27Ac and (C) Prdm1a binding across the genome 1.5 kb upstream and  
1372 downstream of the peak center. (D) Annotation of enriched binding sites by Prdm1a. (E)  
1373 Enriched Prdm1a peaks were subjected to gene ontology (GO) terms analysis using  
1374 ChIPseeker's seq2gene function. (F) Prdm1a peaks were subjected to motif analysis

1375 using HOMER. The top 10 motifs as well as known limb-related motifs are shown. **(G)**  
1376 Tracks showing H3K27Ac enrichment (open chromatin) and Prdm1a binding sites for  
1377 *fgfr1a*, *dlx5a/dlx6a*, and *smo*. There is variability between replicates, but the overall  
1378 trends are comparable (see **Fig. S5**). Abbreviations: e, eye; pf, pectoral fin; y, yolk

1379

1380 **Figure 8: Working model of the Prdm1a gene regulatory network during pectoral**  
1381 **fin development.** Prdm1a acts downstream of limb initiation and *tbx5a* (**Fig. 6A,B**), but  
1382 upstream of limb induction and Fgf signaling. Prdm1a directly binds to and activates  
1383 *fgfr1a* (**Fig. 7G**), allowing Fgf10a to bind (**Fig. 6C-G**). Fgf10a then activates Fgf8a in the  
1384 apical ectodermal ridge (**Fig. 6H-L**), signaling pectoral fin outgrowth. Fgf8a turns on Shh  
1385 signaling in the zone of polarizing activity for anterior/posterior patterning (**Fig. 6Q-R**).  
1386 Prdm1a also directly binds to *smo* (**Fig. 7G**), a receptor Shh signaling, as well as  
1387 *dlx5a/dlx6a*, additional limb outgrowth markers (**Fig. 6M-P**).

1388

## 1389 SUPPLEMENTARY MATERIALS

1390

1391 **Fig. S1: *prdm1a*<sup>+/-</sup> pectoral fins develop normally (related to Fig. 2). (A-C)**  
1392 Representative images of Alcian stained *prdm1a* **(A)** wildtype, **(B)** heterozygous, and  
1393 **(C)** mutant fish at 4 dpf. There is no significant difference between wildtype and  
1394 *prdm1a*<sup>+/-</sup> in the length of the **(D)** cleithrum, **(E)** endoskeletal disk, or **(F)** fin fold or the  
1395 area of the **(G)** scapulocoracoid/postcoracoid. Wildtype and heterozygote animals were  
1396 combined in subsequent experiments. Measurements were averaged and compared  
1397 using a one-way ANOVA, followed by a Tukey post-hoc test relative to wildtype. Error  
1398 bars represent the mean ± SD. Scale bars are 50 μm. Abbreviations: cl, cleithrum; d,  
1399 distal; ed, endoskeletal disk; ff, fin fold; hpf, hours post fertilization; p, proximal; pc,  
1400 postcoracoid; sc, scapulocoracoid

1401

1402 **Fig. S2: Transient overexpression of SHFM *hPRDM1* variants in wildtype embryos**  
1403 **suggests dominant negative effect on pectoral fin growth (related to Fig. 3). (A-F).**  
1404 Representative images of Alcian stained pectoral fins at 4 dpf. **(A)** Uninjected  
1405 wildtype/heterozygous (n=18). **(B)** Uninjected *prdm1a*<sup>-/-</sup> mutant (n=9). Wildtype embryos

1406 were injected with (C) wildtype *hPRDM1* (n=20), (D) *hPRDM1*(p.C239Lfs\*32) (n=16),  
1407 (E) *hPRDM1*(p.T524R) (n=14), or *hPRDM1*(p.T819A) mRNA (n=17). Measurements for  
1408 the length of the (G) cleithrum, (H) endoskeletal disk, and (I) fin fold and (J) the area of  
1409 the scapulocoracoid and postcoracoid were averaged and compared using a one-way  
1410 ANOVA, followed by a Tukey post-hoc test relative to uninjected wildtype. Error bars  
1411 represent the mean  $\pm$  SD. Scale bars are 50  $\mu$ m. Abbreviations: cl, cleithrum; d, distal;  
1412 ed, endoskeletal disk; ff, fin fold; hpf, hours post fertilization; p, proximal; pc,  
1413 postcoracoid; sc, scapulocoracoid

1414

1415 **Fig. S3: Overexpression of modified Prdm1a using a global heat shock Gal4/UAS**

1416 **system in wildtype embryos (related to Fig. 4).** (A-H) Representative images of  
1417 Alcian stained pectoral fins at 4 dpf are shown. (A) Uninjected wildtype (n=36). (B)  
1418 Uninjected *prdm1a*<sup>-/-</sup> mutants (n=11). Wildtype embryos were injected with *4XnrUAS-*  
1419 *modified prdm1a-2a-EGFP* constructs containing (C) full-length Prdm1a (n=55), (D)  
1420 Prdm1a $\Delta$ SET (n=37), (E) Prdm1a $\Delta$ P/S (n=38), (F) Prdm1a $\Delta$ Znf (n=37), (G)  
1421 Prdm1a $\Delta$ P/S&Znf (n=33), and (H) an EGFP negative control (n=30). Scale bars are 50  
1422  $\mu$ m. Measurements were taken for the length of the (I) cleithrum, (J) endoskeletal disk,  
1423 and (K) fin fold and (L) the area of the scapulocoracoid and postcoracoid.

1424 Measurements for each individual were then averaged and compared using a one-way  
1425 ANOVA, followed by a Tukey's post-hoc test relative to uninjected, heat shocked  
1426 *prdm1a*<sup>-/-</sup> mutants. Error bars represent the mean  $\pm$  SD. Abbreviations:  $\Delta$ , deleted; cl,  
1427 cleithrum; d, distal; dpf, days post fertilization; ed, endoskeletal disk; ff, fin fold; hpf,  
1428 hours post fertilization; p, proximal; pc, postcoracoid; sc, scapulocoracoid

1429

1430 **Fig. S4: Loss of Prdm1a leads to decreased expression of limb genes (related to**

1431 **Fig. 6).** (A-L) RT-qPCR was performed on pooled embryo heads at (A-F) 24 hpf and  
1432 (G-L) 48 hpf for (A, G) *fgf10a*, (B, H) *fgf24*, (C, I) *tp63*, (D, J) *dlx5a*, (E, K) *dlx6a*, and (F,  
1433 L) *fgf8a* (n=5-6 embryos per genotype per biological replicate. Three biological  
1434 replicates were used). Relative expression was compared using an unpaired,  
1435 independent *t* test. Error bars represent the mean  $\pm$  SD. (M-O) Gene expression was  
1436 visualized by HCR in wildtype and *prdm1a*<sup>-/-</sup> mutants. Expression in mutants was

1437 variable. Samples with high and low expression for (M) *fgf10a*, (N) *fgf8a*, and (O) *shha*  
1438 in mutants are shown. Scale bars are 50  $\mu$ m. All images are 3D max projections of  
1439 lateral views of the pectoral fin. Background was subtracted using the rolling ball feature  
1440 in ImageJ (50 pixels). Abbreviations: AER, apical ectodermal ridge; d, distal; hpf, hours  
1441 post fertilization; p, proximal; ZPA, zone of polarizing activity

1442

1443 **Fig. S5: Additional replicates from CUT&RUN showing Prdm1a directly binds to**  
1444 **limb genes (related to Fig. 7).** CUT&RUN was performed on isolated EGFP-positive  
1445 pectoral fin cells at 24 hpf in *Tg(Mmu:Prx1-EGFP)* fish at 24 hpf. (A-B) Coverage  
1446 heatmaps of (A) H3K27Ac and (B) Prdm1a binding across the genome 1.5 kb upstream  
1447 and downstream of transcription start sight. (C) Annotation of enriched binding sites by  
1448 Prdm1a. (D) Enriched Prdm1a peaks were subjected to gene ontology (GO) terms  
1449 analysis using ChIPseeker's seq2gene function. (E) Prdm1a peaks were subjected to  
1450 motif enrichment analysis using HOMER. The top 10 motifs as well as known limb-  
1451 related motifs are shown. (F) Tracks showing H3K27Ac enrichment (open chromatin)  
1452 and Prdm1a binding sites for *fgfr1a*, *dlx5a/dlx6a*, and *smo*. There is variability between  
1453 replicates, but the overall trends are comparable.

1454

1455 **Fig. S6: Hypomorphic *Tg(dlx5a:EGFP)* mutants are trending towards rescuing**  
1456 ***prdm1a*<sup>-/-</sup> mutants.** (A-F) Representative images of Alcian stained pectoral fins at 4 dpf.  
1457 Hypomorphic *Tg(dlx5a:EGFP)* fish were crossed with *prdm1a*<sup>+/-</sup> and then incrossed to  
1458 assess the genetic interaction between *dlx5a* and *prdm1a*. (A) Wildtype (n=18). (B)  
1459 *Tg(dlx5a:EGFP)*<sup>+/+</sup>;*prdm1a*<sup>-/-</sup> (n=9). (C) *Tg(dlx5a:EGFP)*<sup>+/-</sup>;*prdm1a*<sup>+/+</sup> (n=35). (D)  
1460 *Tg(dlx5a:EGFP)*<sup>+/-</sup>;*prdm1a*<sup>-/-</sup> (n=15). (E) *Tg(dlx5a:EGFP)*<sup>-/-</sup>;*prdm1a*<sup>+/+</sup> (n=12) (F)  
1461 *Tg(dlx5a:EGFP)*<sup>-/-</sup>;*prdm1a*<sup>-/-</sup> (n=6). Measurements were taken for the length of the (G)  
1462 cleithrum, (H) endoskeletal disk, and (I) fin fold and (J) the area of the scapulocoracoid  
1463 and postcoracoid. Measurements for each individual were averaged and compared  
1464 using a one-way ANOVA, followed by a Tukey's post-hoc test relative to *prdm1a*<sup>-/-</sup>  
1465 mutants. Error bars represent the mean  $\pm$  SD. Abbreviations: cl, cleithrum; dpf, days  
1466 post fertilization; ed, endoskeletal disk; ff, fin fold; hpf, hours post fertilization; pc,  
1467 postcoracoid; sc, scapulocoracoid

1468

1469 **Table S1: Gene candidates identified in whole exome sequencing of Split**

1470 **Hand/Foot Malformation patients.**

1471

1472 **Table S2: Primer sequences for site-directed mutagenesis.**

1473

1474 **Table S3: Motif enrichment analysis in called Prdm1a CUT&RUN peaks using**

1475 **Homer.**

**A** Table 1. SHFM patient PRDM1 variants. Each patient is heterozygous for the mutation.

| ID | cDNA          | Protein        | Mutation            | MAF    | PP2_HD            | MT              | SIFT     | CADD  |
|----|---------------|----------------|---------------------|--------|-------------------|-----------------|----------|-------|
| 1  | c.712_713insT | p.(C239Lfs*32) | FS; Pre-mature stop | 0      | NA                | Disease causing | NA       | NA    |
| 2  | c.1571C>G     | p.(T524R)      | Missense            | 6.6E-4 | Possibly damaging | Polymorphism    | Damaging | 18.67 |
| 3  | c.2455A>G     | p.(T819A)      | Missense            | 5.0E-5 | Possibly damaging | Disease causing | Damaging | 21.0  |

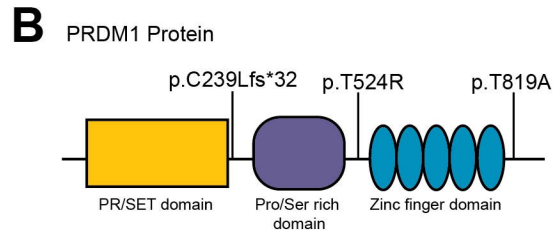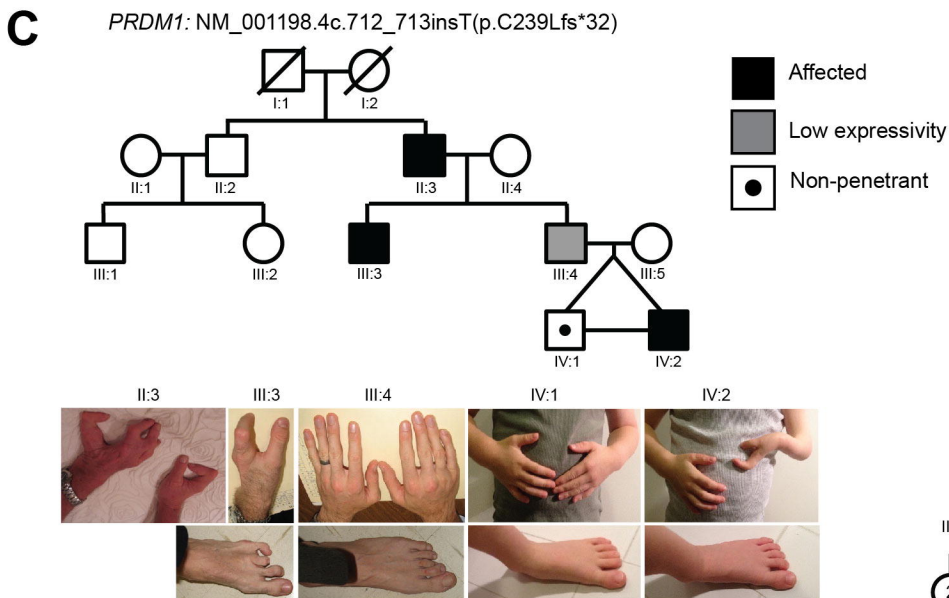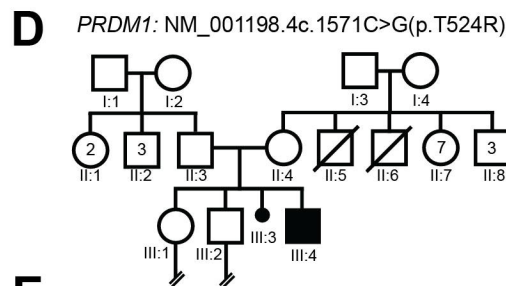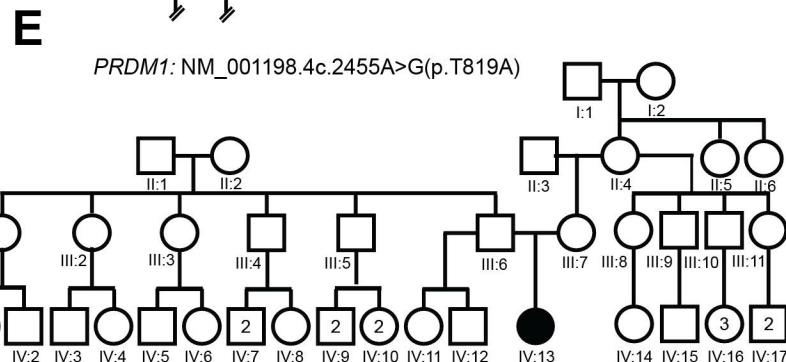

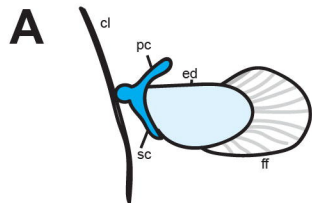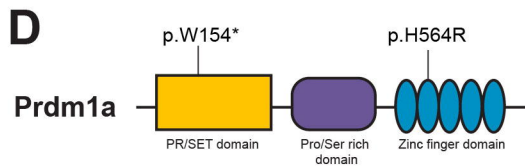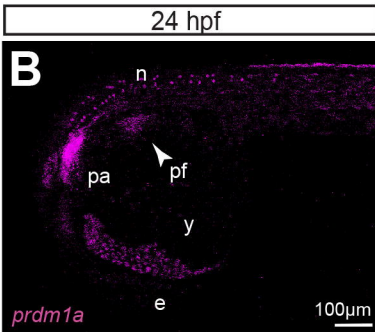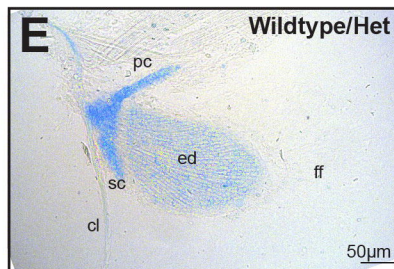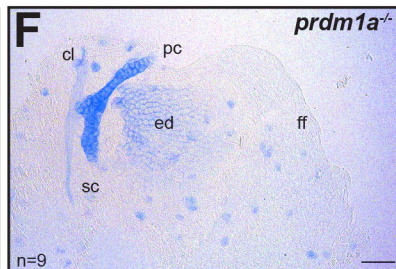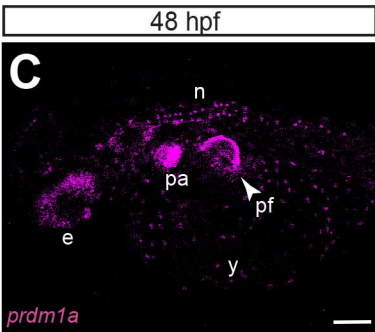

P ↔ D

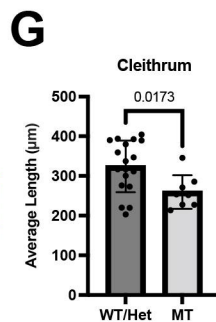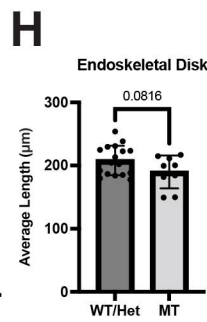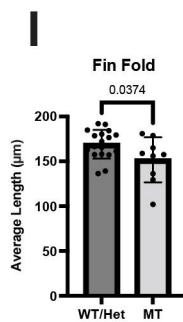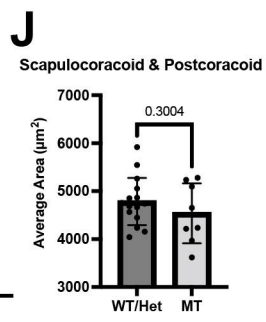

Ant ↔ Post

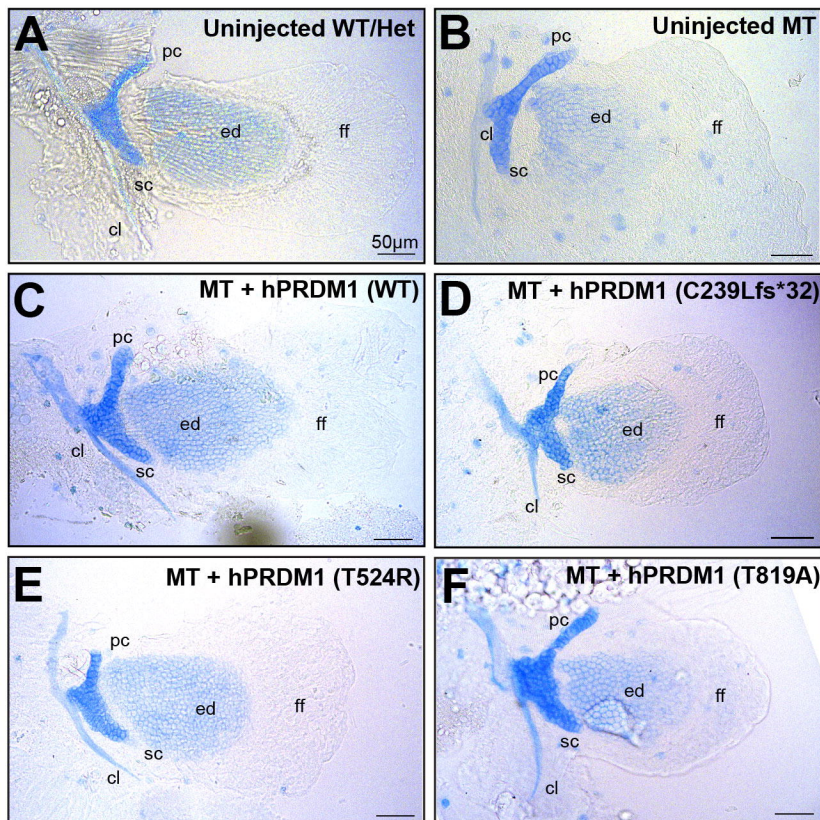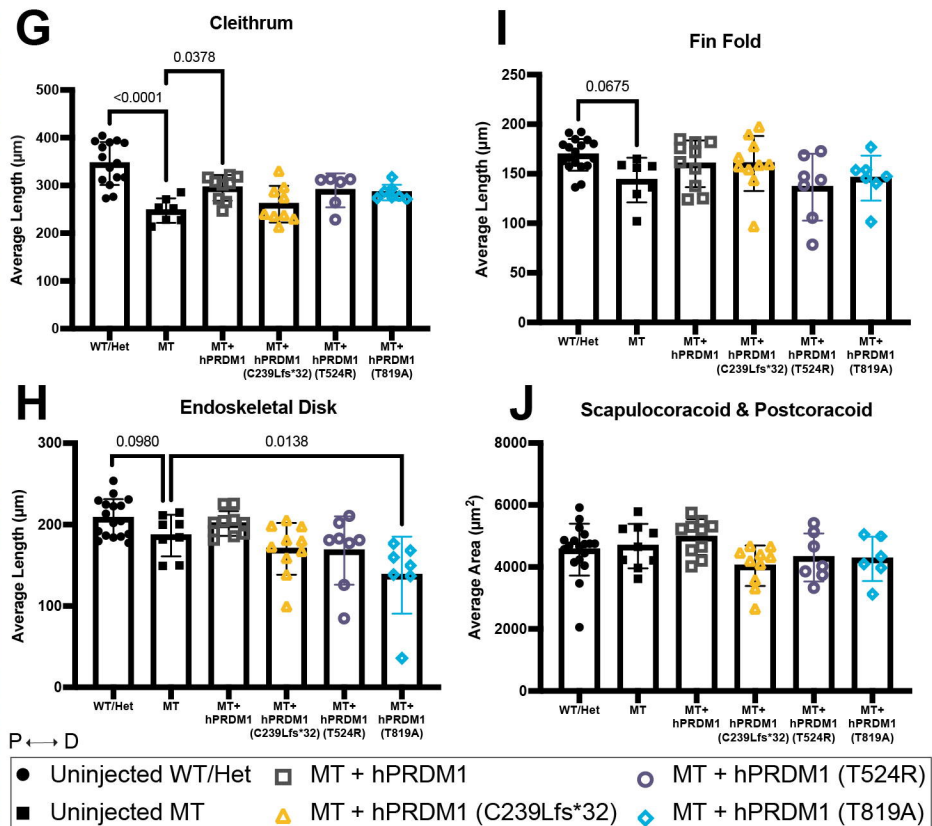



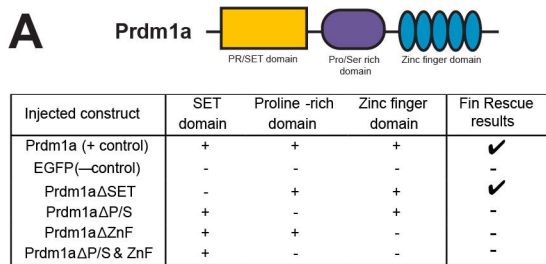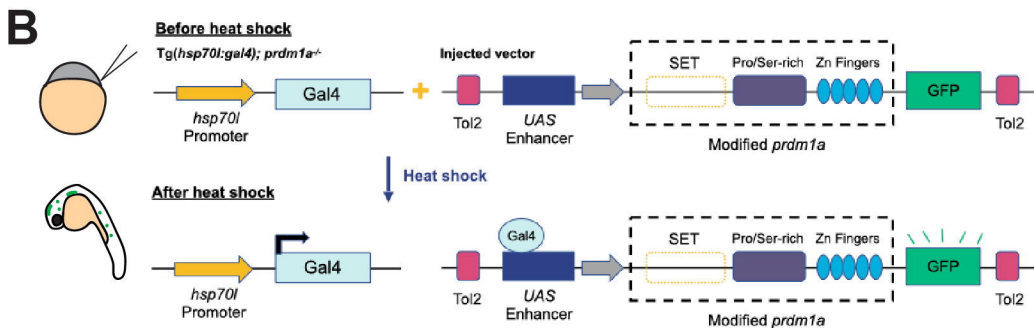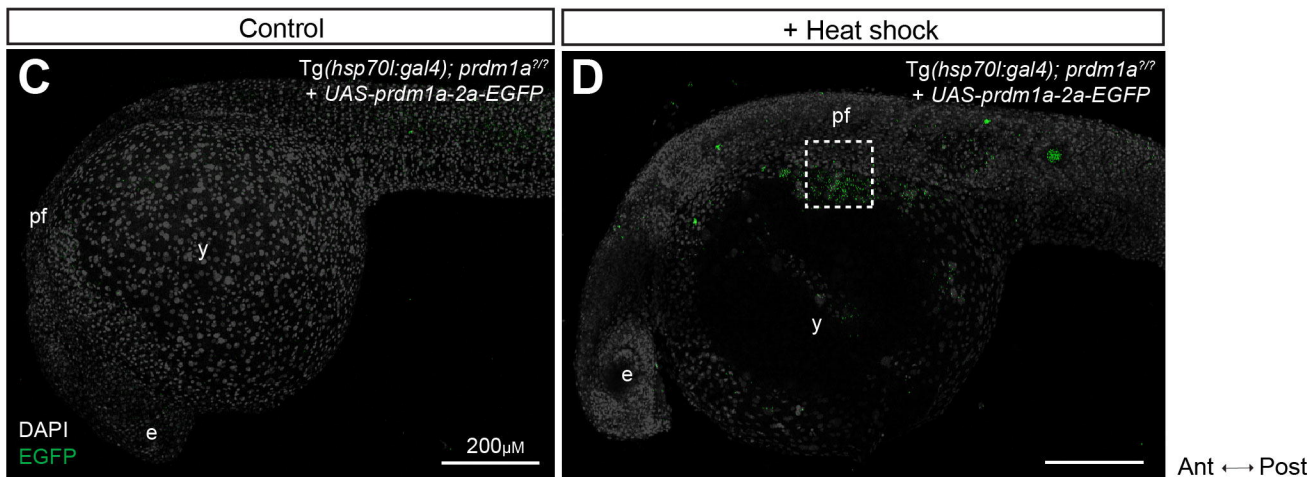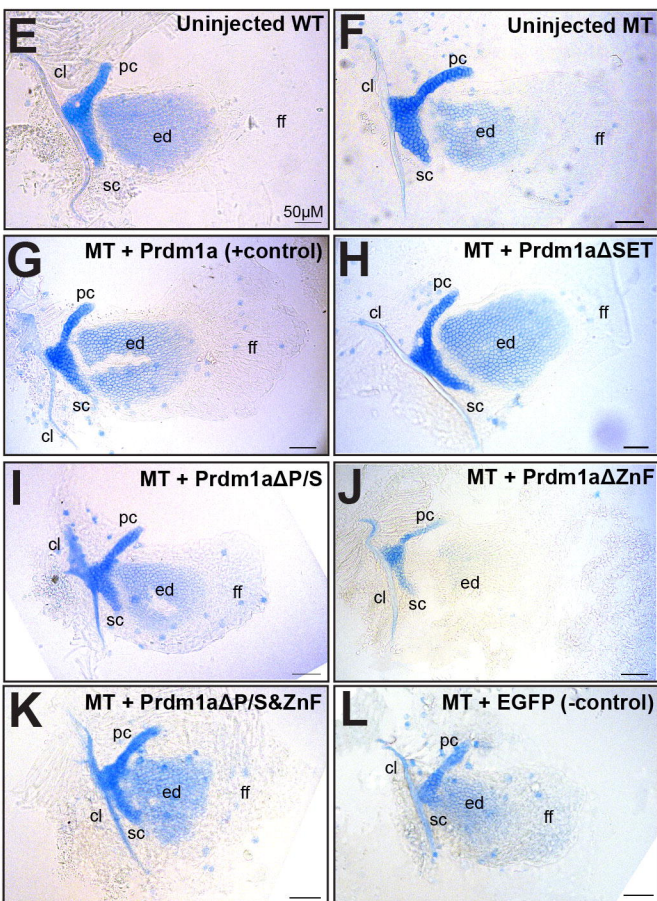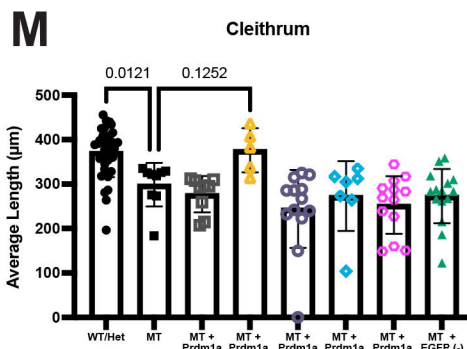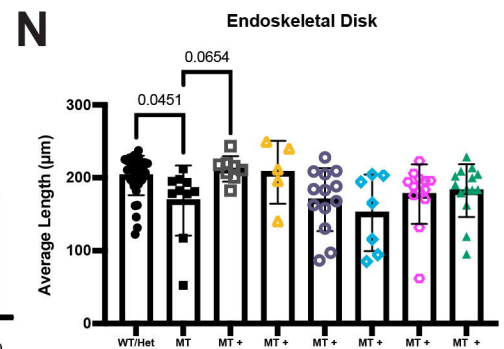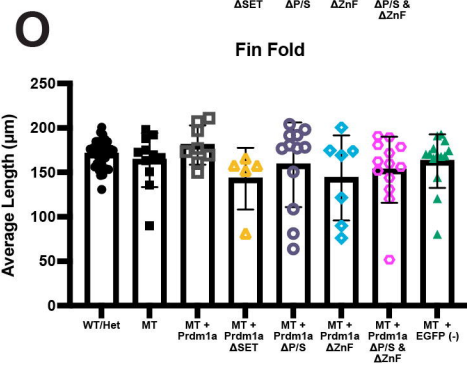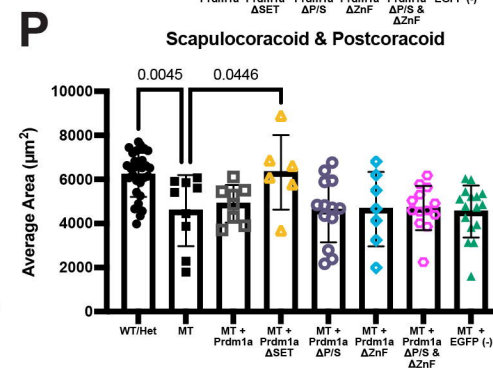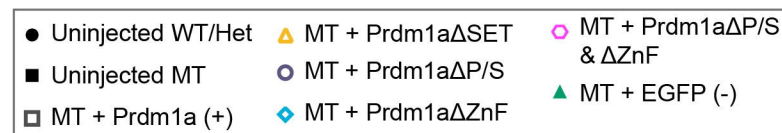

P ↔ D

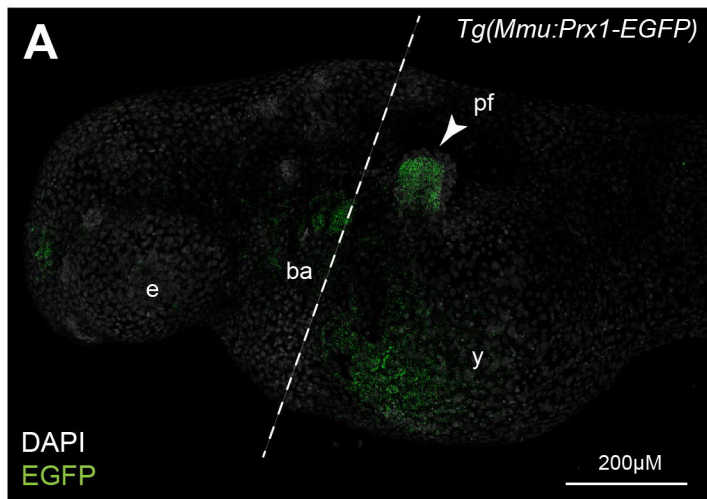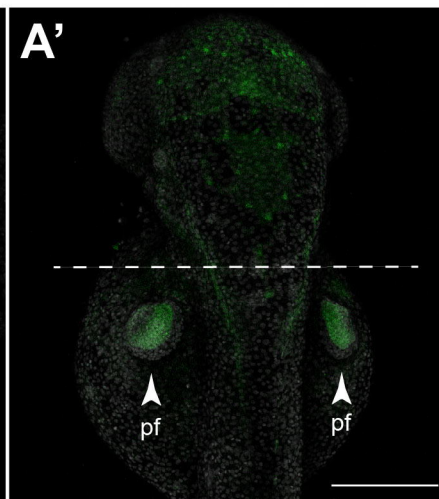

A ↔ P

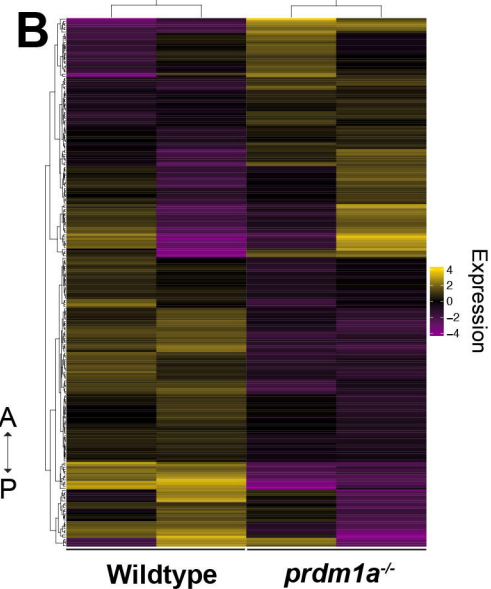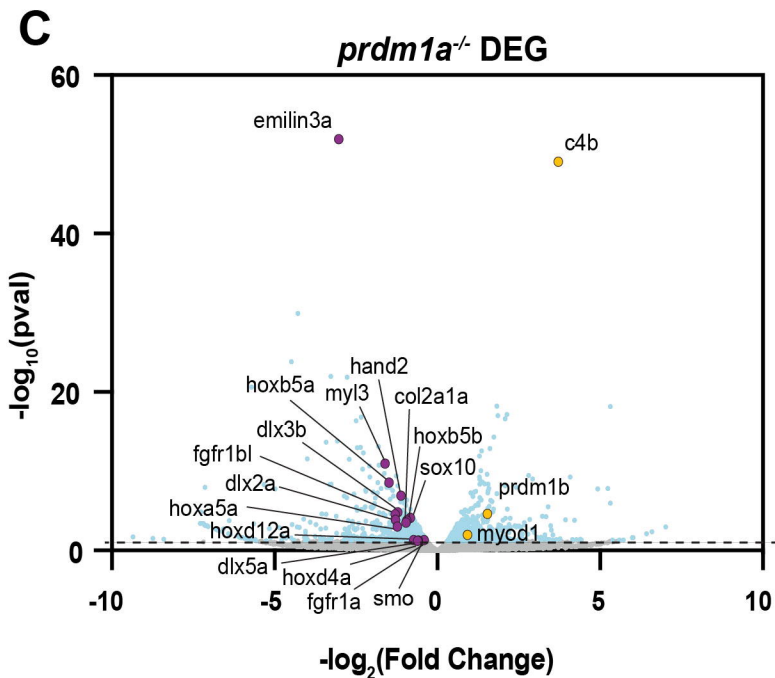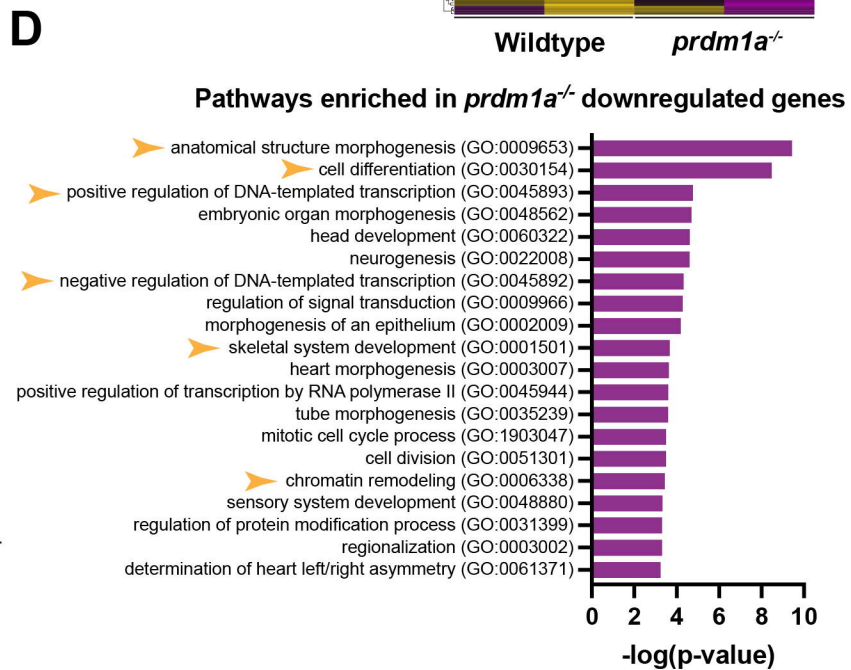

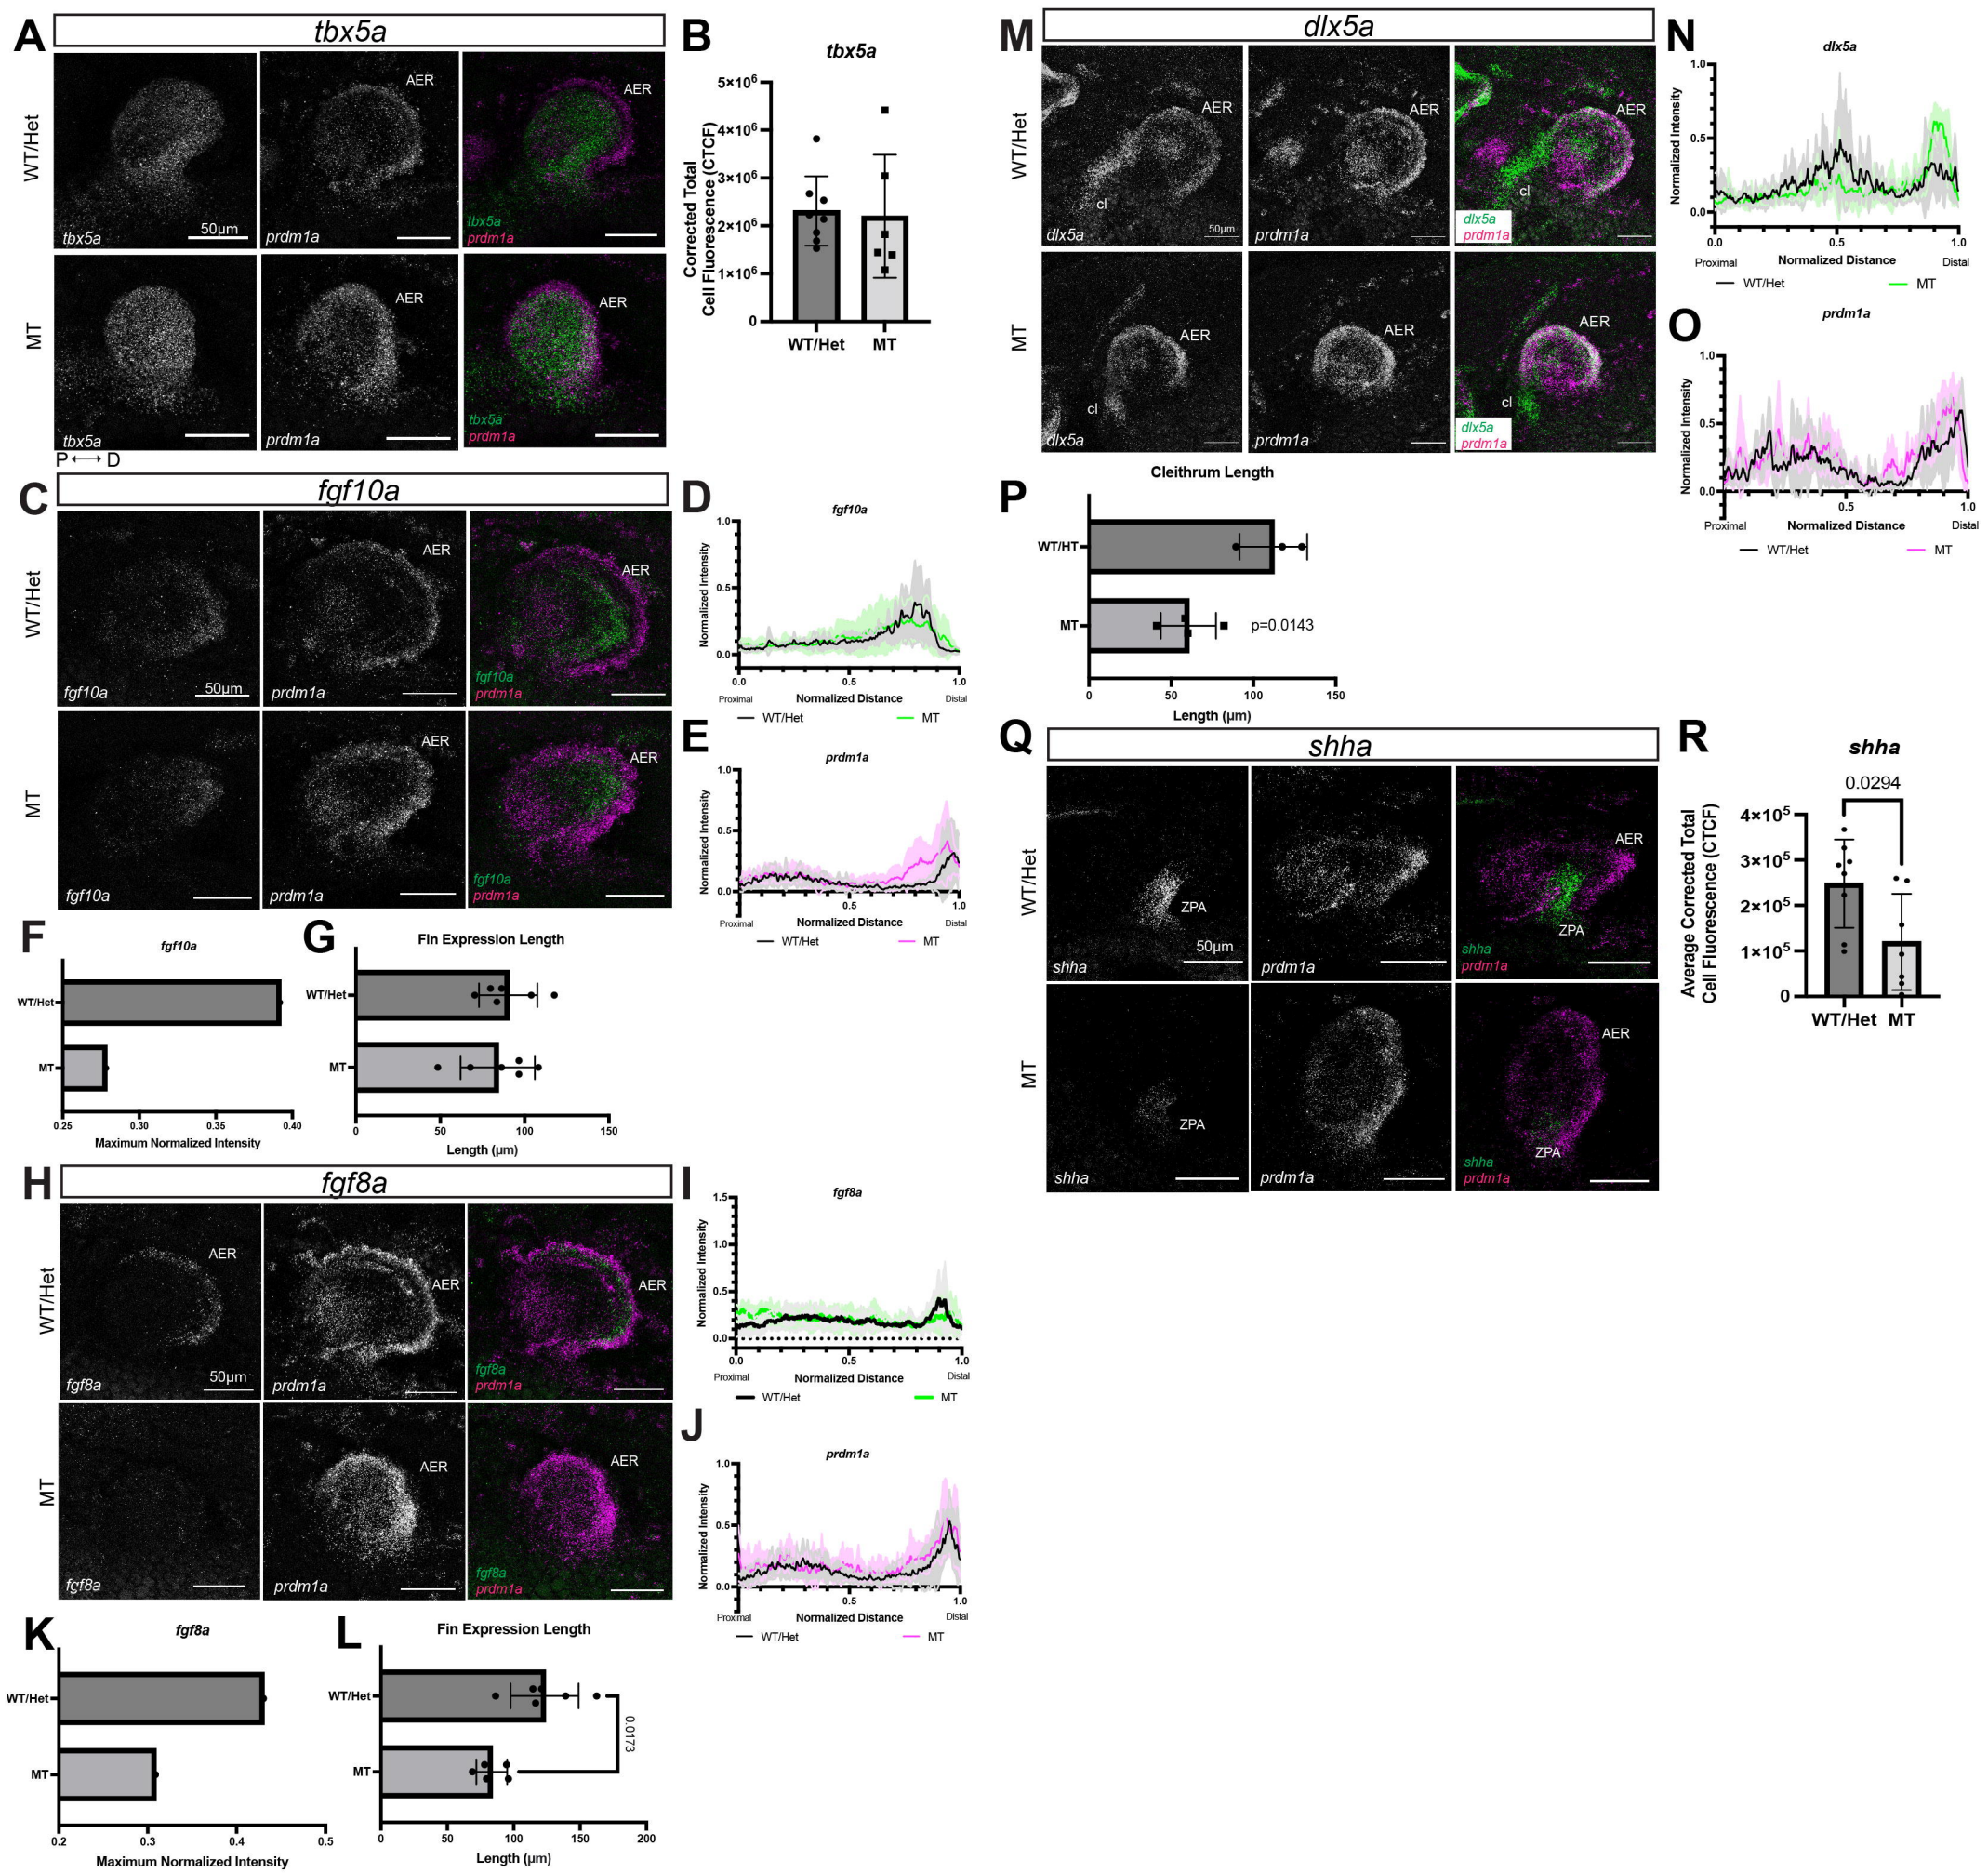

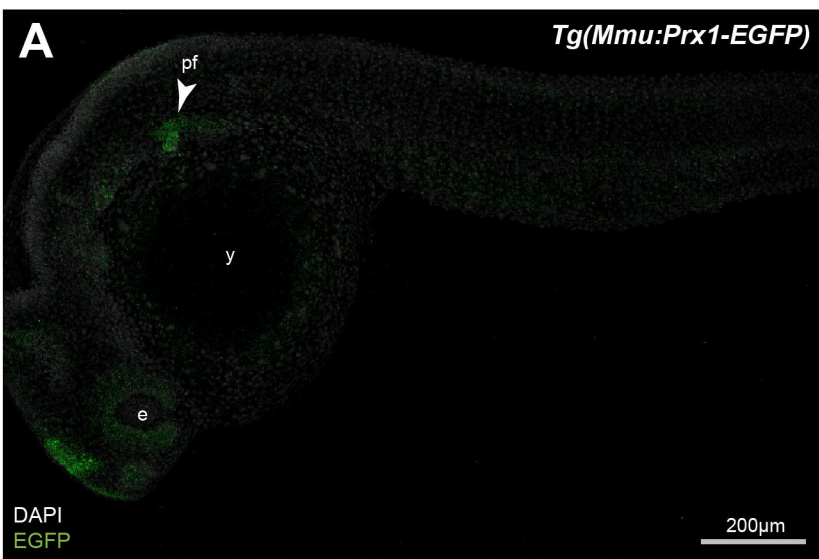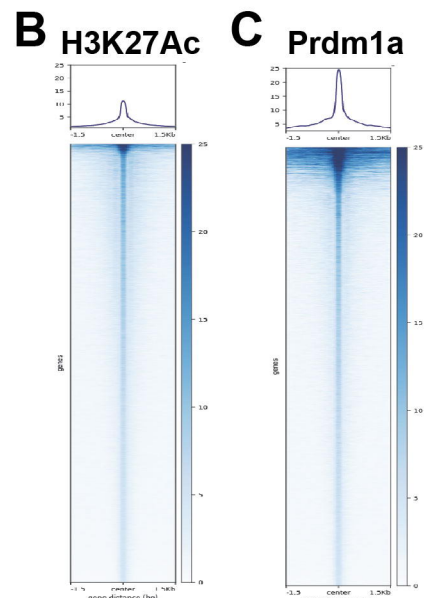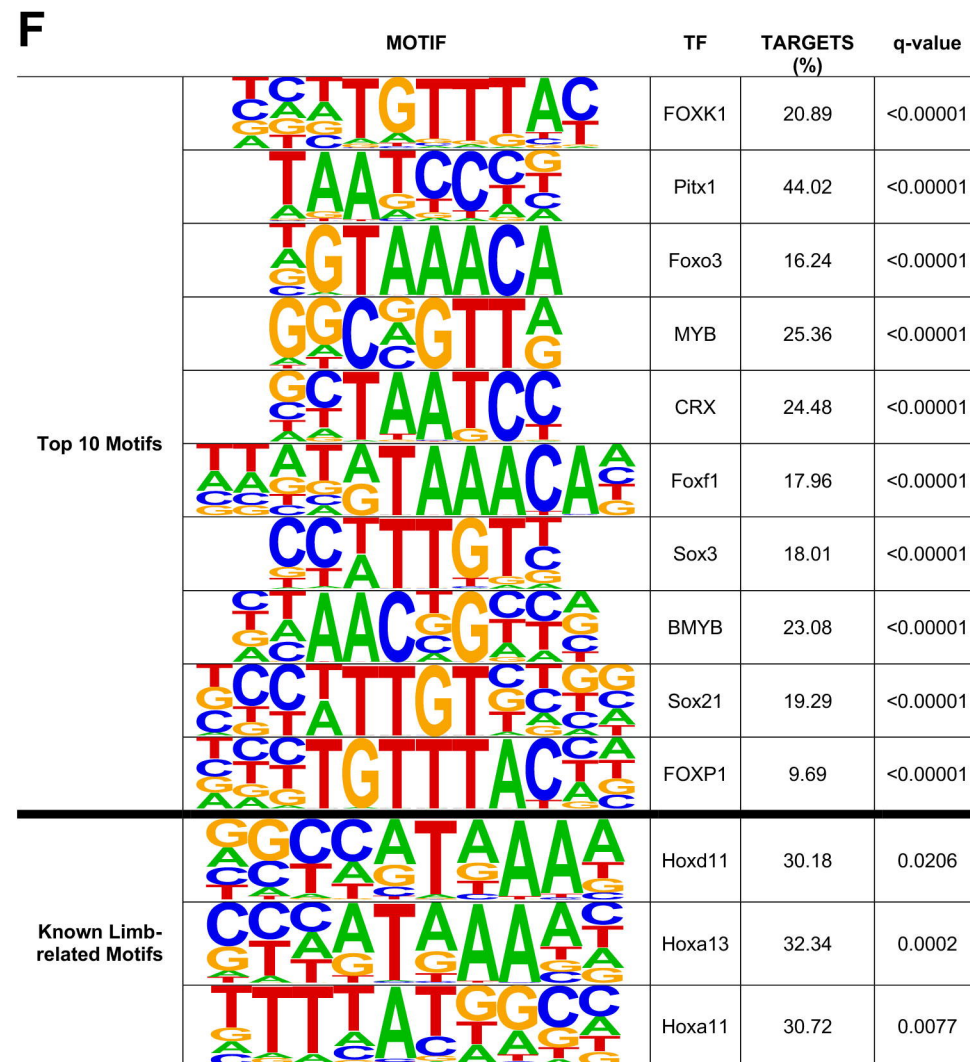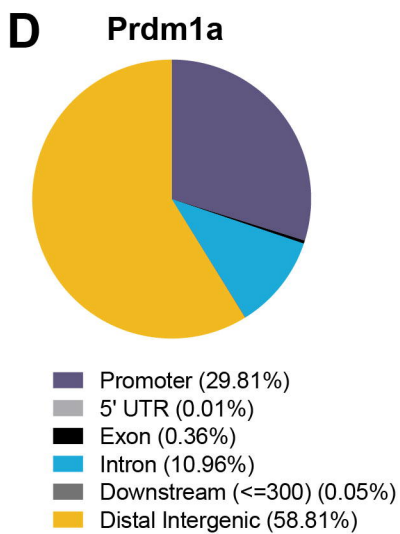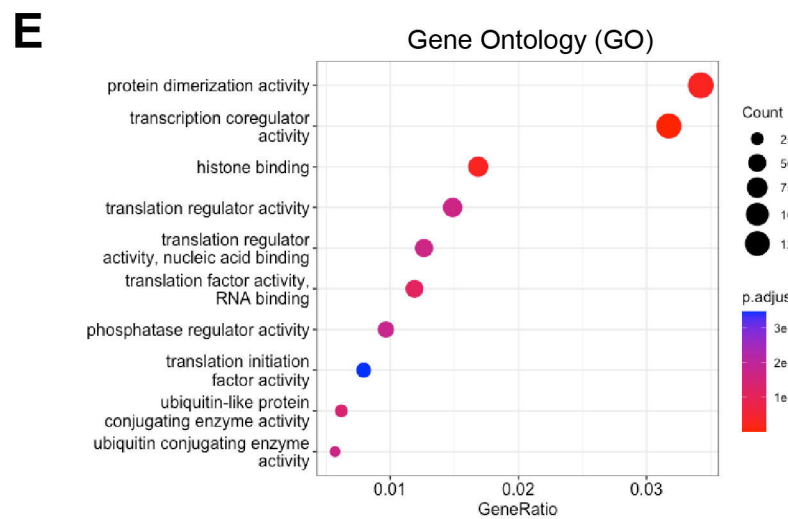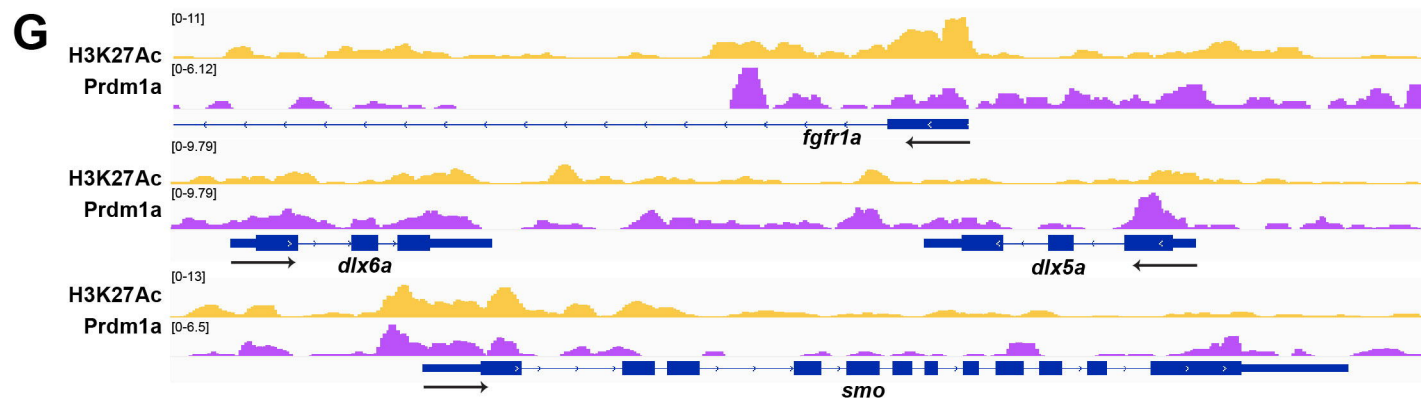

Initiation

Induction

Outgrowth

Anterior/Posterior  
Patterning

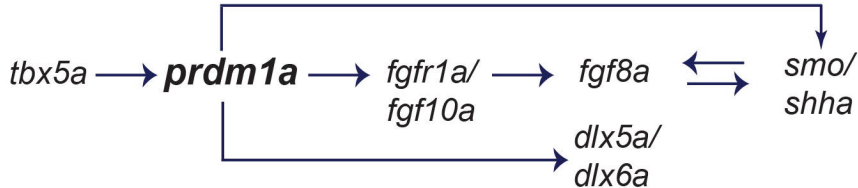

Source: https://www.medrxiv.org/content/10.1101/2022.11.16.22282191v1.full.pdf
